RESEARCH ARTICLE

# Stitching competition with digital threads: Unveiling the drivers of competitive success in the apparel sector

Emmanuel Susitha<sup>1\*</sup>, Amila Jayarathne<sup>2</sup>, H. M. R. P. Herath<sup>3</sup>

**1** Faculty of Graduate Studies, University of Kelaniya, Kelaniya, Sri Lanka, **2** Faculty of Management Studies and Commerce, University of Sri Jayawardanapura, Nugegoda, Sri Lanka, **3** Department of Information Management, SLIIT Business School, Malabe, Sri Lanka

\* [esusit.dba21002@kln.ac.lk](mailto:esusit.dba21002@kln.ac.lk), [susithae@gmail.com](mailto:susithae@gmail.com)

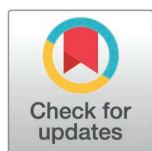

## OPEN ACCESS

**Citation:** Susitha E, Jayarathne A, Herath HMRP (2025) Stitching competition with digital threads: Unveiling the drivers of competitive success in the apparel sector. PLOS One 20(6): e0325945. <https://doi.org/10.1371/journal.pone.0325945>

**Editor:** Manuel Herrador, University of Jaen: Universidad de Jaen, SPAIN

**Received:** February 27, 2025

**Accepted:** May 20, 2025

**Published:** June 10, 2025

**Peer Review History:** PLOS recognizes the benefits of transparency in the peer review process; therefore, we enable the publication of all of the content of peer review and author responses alongside final, published articles. The editorial history of this article is available here: <https://doi.org/10.1371/journal.pone.0325945>

**Copyright:** © 2025 Susitha et al. This is an open access article distributed under the terms of the [Creative Commons Attribution License](https://creativecommons.org/licenses/by/4.0/), which permits unrestricted use, distribution, and reproduction in any medium, provided the original author and source are credited.

## Abstract

This study explores and validates the dimensions of digital capabilities and competitive performance within the apparel industry, aiming to develop a robust, multidimensional measurement instrument. Employing a sequential QUAL→QUAN exploratory design, the research began with in-depth interviews with key industry experts to identify critical constructs. These insights informed the subsequent quantitative phase, in which exploratory factor analysis and confirmatory factor analysis were applied to confirm the factor structure and validate the instrument. The study identifies four key dimensions of competitive performance in the apparel supply chain: customer satisfaction, better utilisation of resources, collaboration to compete, and strategic advantage. Process and technical digitalisation emerged as essential components of digital capabilities, reflecting the dual role of digital infrastructure and operational integration in enhancing performance. Theoretically, this research contributes by introducing validated instruments grounded in the Resource-based view, the Dynamic capabilities view, and the Extended resource-based view, offering an empirical framework that links digital capabilities with competitive performance. Practically, the instrument provides apparel manufacturers with a diagnostic tool to assess digital maturity and strategically align digital initiatives with performance goals. These findings are particularly relevant for firms navigating rapid technological change and seeking sustained global apparel supply chain competitiveness.

## Introduction

Globalisation and technological advancements have fundamentally transformed competition across industries. Organisations prioritise innovation, brand differentiation, and strategic resource management to remain competitive in market relevance and success [1]. In this evolving global market, competition has shifted from focusing

**Data availability statement:** All relevant data are within the manuscript and its [Supporting Information](#) files.

**Funding:** The author(s) received no specific funding for this work.

**Competing interests:** No authors have competing interests.

on price and scale to a more complex dynamic where agility, speed to market, and innovation are critical determinants of competitive advantage [2]. Organisations must constantly innovate their product offerings and operational strategies to outperform competitors in fast-paced and ever-changing business environments.

Competitive performance (CP) has become a central measure of organisational success in this rapidly changing environment. CP reflects an organisation's ability to outperform its competitors, ensuring long-term market relevance and profitability [3–6]. Research shows that companies with intense CP are better positioned to navigate market fluctuations, seize emerging opportunities, and effectively manage challenges [4,5]. This phenomenon is particularly relevant in industries with standard fast-paced change and high demand volatility. In such environments, businesses must constantly adapt, innovate, and make strategic decisions. These factors are essential in industries with short product lifecycles, rapid technological advancements, and intense competition [7–9]. Organisations in these environments face constant pressure to reduce time to market, innovate their product offerings, and manage costs while delivering high-quality service [10]. Balancing these demands and aligning them with long-term strategic goals is crucial for maintaining a competitive edge.

The apparel industry is one of the world's most resilient sectors. Historically, it played a central role in industrialisation during the 1960s and 1970s, particularly in developed economies such as the United States, the United Kingdom, Japan, and various countries within the European Union, as well as in emerging markets [11,12]. However, starting in the 1980s, the global apparel industry experienced a significant transformation, shifting production to developing nations in Asia and Africa. Countries like China, Bangladesh, India, and Vietnam became major apparel exporters, leveraging lower labour costs and increasingly efficient supply chains to compete globally [13]. This shift has had profound socioeconomic impacts, creating millions of jobs, particularly for women, and helping many developing nations transition from agriculture-based economies to industrialisation. The apparel sector has played a vital role in reducing poverty and fostering socioeconomic growth in these countries by driving economic development [14]. As globalisation deepened, competition in the apparel industry intensified significantly. This heightened competition has forced leading companies to focus on critical areas such as innovative design, brand differentiation, and strategic marketing to maintain their competitive edge [1]. The fast fashion business model, characterised by rapid product turnover and constant consumer demand for new styles, has further accelerated competition, pressuring companies to continuously innovate in product development and supply chain efficiency [15].

The apparel industry is experiencing a significant transformation driven by the integration of digital technologies, which is crucial in enhancing competitive advantage and performance. Digital orientation and capabilities have positively impacted innovation and overall firm performance [16], with artificial intelligence becoming increasingly vital for integrating digital intelligence into core operations [17]. In fashion SMEs, digital capabilities (DCs) link strategic assets and competitive advantage, influencing firm performance [18], while IT assets are essential for improving organisational capabilities and operational efficiency [19]. Additionally, marketing capabilities,

especially in image differentiation and promotions, are critical for maintaining competitiveness in fashion retailing [20]. Enterprise IT applications strengthen cross-channel capabilities and enhance managerial actions, improving operational efficiency and responsiveness to market demands [21].

Furthermore, supply chain capabilities, particularly those involving organisational culture and relational factors, contribute to operational performance and technology adoption. Sustainable technology adoption, driven by stakeholder pressures, enhances environmental and financial performance [22], while the digital revolution in enterprise architecture has improved operational efficiency and product innovation [23]. Despite the evidence supporting the role of digital technologies, there remains a gap in understanding which specific DCs most effectively contribute to CP in the apparel industry, particularly in developing economies [24].

At the same time, Digital technologies are crucial in enhancing business competitiveness and performance across various industries. Numerous studies have developed instruments to measure the impact of DCs, with a focus on areas such as digital supply chain activities [25], new product performance [26], overall business performance [27], sustainable competitive advantage [28], firm performance in international markets [29], and evaluating competitive capacity of business entities [30]. While these instruments provide valuable insights into specific aspects of digital transformation, there remains a significant gap in measuring the CP of apparel organisations, particularly concerning how DCs enhance their CP. Despite the apparel industry being a critical sector that has embraced digital transformation, instruments tailored to measure the unique competitive dynamics in this industry are lacking. Existing measurement tools are often generalised across industries, missing the apparel-specific factors like fast fashion dynamics, rapid product turnover, and sustainability pressures that uniquely shape competitiveness in this sector. Several scholars have pointed out that industry-specific instruments are necessary to accurately assess how digital technologies influence CP [22,23,31,32]. This lack of tailored instruments hinders the ability of apparel companies to systematically assess and leverage their DC for CP, underscoring the need for further research and development of specific tools. To address this empirical gap, the research objectives (ROs) were established:

RO1: To explore the DC dimensions and indicators that impact the CP of the apparel industry.

RO2: To explore the CP dimensions and indicators of the apparel industry.

RO3: To develop the measurement scales for CP and DC of the apparel industry.

The remainder of this paper includes a comprehensive literature review, followed by detailed data analysis, discussion of the findings, and concluding remarks.

## Literature review

This literature review provides a concise overview of DCs and CP, laying the foundation for the research and contextualising its key themes.

## Theoretical influence

To understand how digital transformation drives competitive performance in the apparel supply chain, it is insufficient to rely on a single theoretical lens. Traditional theories often fail to explain the complex, evolving role in volatile and highly competitive environments. This study argues for an integrated theoretical foundation drawing on the Resource-Based View (RBV), the Dynamic Capabilities View (DCV), and the Extended Resource-Based View (ERBV) to more comprehensively explain how digital transformation contributes to sustainable competitive advantage in the apparel industry.

The RBV has long been a dominant framework in strategic management, asserting that firms gain sustainable competitive advantage by leveraging resources that are valuable, rare, inimitable, and non-substitutable [33]. While this view offers a useful starting point, it is limited in its ability to account for rapid technological change and digital disruption.

Nonetheless, when embedded in firm-specific routines and integrated across processes, digital capabilities meet the VRIN criteria [34]. In the apparel supply chain, digital planning systems, real-time data analytics, and supply chain automation can no longer be considered generic IT tools; they are now strategic resources that shape cost structures, customer responsiveness, and production flexibility [35]. Therefore, this study contends that RBV remains relevant, but must be adapted to recognise the strategic heterogeneity and intangible nature of digital capabilities in contemporary supply chains. While RBV focuses on resource possession, it fails to address how firms respond to rapid environmental change. In highly dynamic markets such as apparel, where demand volatility, fashion cycles, and customer preferences shift rapidly, the ability to reconfigure and adapt resources becomes paramount. Here, the DCV offers a more appropriate lens. Competitive advantage lies not only in what a firm owns but in what it can do with those assets in turbulent environments [36–39]. This study posits that digital capabilities are dynamic mechanisms that allow firms to sense market changes, seize new opportunities, and transform operational processes. Technologies such as AI-based forecasting tools, digital sampling platforms, and collaborative supply chain portals exemplify how firms adapt proactively to shifting demands. In line with Eisenhardt and Martin [40], this view is especially relevant for firms in fast fashion, where speed and flexibility are not just operational advantages but survival imperatives.

The RBV and DCV, however, remain largely inward-looking. Such internal focus is inadequate in today's digitally interconnected and sustainability-conscious global supply chains. The ERBV offers a necessary extension by recognising the role of externally embedded resources, particularly those related to environmental sustainability, inter-firm collaboration, and technological ecosystems [41,42]. This study argues that the value of digital capabilities cannot be fully understood without considering their role in shaping external relationships and stakeholder alignment. Tools such as blockchain for supply chain traceability, IoT-enabled monitoring for compliance, and cloud-based platforms for supplier integration illustrate how digital transformation extends beyond firm boundaries to influence ecosystem-wide competitiveness [43,44]. ERBV thus enables a broader understanding of how digital strategies contribute to firm-level performance, long-term resilience and value co-creation across the supply chain. RBV, DCV, and ERBV offer complementary yet distinct insights into how digital capabilities influence competitive performance. This study argues that relying on any single framework would provide an incomplete picture. The RBV explains the foundational value of digital capabilities, DCV captures their dynamic and adaptive nature, and ERBV situates them within broader network and sustainability contexts. By integrating these perspectives, this study develops a theoretically rigorous foundation to assess how digital transformation can enable apparel firms to achieve sustained competitiveness in a digitally evolving global marketplace when measured and aligned strategically.

### Competitive performance in the apparel industry

CP in the apparel industry is vital for sustaining a competitive edge in today's highly dynamic and fast-paced global market. Unlike other industries where internal operational efficiency might suffice, in the apparel sector, the performance of the entire supply chain (SC) from delivering products on time to maintaining availability and demonstrating agility directly influences a company's competitiveness [45]. CP in the apparel industry is not just about individual firms excelling but about how effectively the extended SC, including suppliers, manufacturers, logistics providers, and retailers, works together to meet end customers' expectations. Achieving this comprehensive performance is crucial for companies to succeed in an industry marked by short product life cycles, fluctuating demand, and globalised production networks.

A central aspect of CP in the apparel industry is operational performance, which encompasses critical metrics such as cost control, adaptability, efficiency, and timely delivery [46]. Unlike more generic supply chains, apparel companies must be highly flexible to adapt to seasonal shifts, changing fashion trends, and evolving consumer preferences. In this context, agility becomes a critical determinant of CP, allowing the SC to quickly respond to market disruptions such as sudden changes in demand or supply shortages [47]. Apparel companies that fail to embed agility in their supply chains risk losing market share to competitors who can respond more quickly and efficiently. Therefore, CP in this sector is closely linked to

the SC's ability to adjust production and distribution in real-time to align with market needs, making agility a key factor for gaining a competitive advantage. Integrating operational and financial metrics in evaluating CP is particularly important in the apparel supply chain. While economic performance indicators such as profitability and return on investment remain essential, an accurate measure of CP goes beyond these financial outcomes. Operational excellence, characterised by reduced lead times, optimised production schedules, and efficient resource utilisation, directly impacts a supply chain's ability to drive profitability [48]. For apparel supply chains, this requires balancing cost-efficiency with meeting tight deadlines and maintaining product quality. The unique challenges of the apparel industry, such as rapid changes in fashion and the complexity of global distribution, demand that supply chains focus on both financial results and operational flexibility, making CP a multidimensional concept that requires attention to both areas [49].

Additionally, relational capabilities are critical in enhancing CP within the apparel industry. Strong partnerships between suppliers, manufacturers, and retailers ensure smooth coordination across the entire SC. Khai, Mohamed, and Hassan [50] emphasise that building supplier partnerships, maintaining strong customer relationships, and facilitating efficient information sharing are essential for improving CP. These relationships are critical in the apparel industry, where production frequently spans multiple countries and requires tight synchronisation among various stakeholders. For instance, aligning production schedules between suppliers and manufacturers can significantly reduce lead times, enhance responsiveness, and lower costs, which are crucial factors for maintaining CP. Sharing real-time information across the SC allows companies to mitigate risks and make agile decisions, which is especially important in a volatile market environment. Efficiency within the apparel industry's SC is another major factor influencing competitive performance. Ahmad, Khalil, and Rashed [51] suggest an integrated SC model that optimises resources and minimises waste. This approach is crucial in an industry with slim profit margins, and speed is a critical differentiator. Integrating various stages of the SC, from raw material sourcing to final product delivery, ensures resources are utilised efficiently and that the SC operates without unnecessary delays or costs. This integration is critical to maintaining CP, as it enables companies to reduce operational costs while enhancing service delivery, ultimately leading to greater profitability and competitiveness in the market.

### Competitive performance indicators of the apparel industry

One of the essential indicators of competitive performance is maintaining a competitive unit price, which plays a pivotal role in attracting and retaining customers [52,53]. Closely linked is the continual optimisation of pricing structures to better serve customers, allowing companies to remain competitive in a fluctuating market [52,53]. Responsiveness to market dynamics and emerging opportunities is another critical factor, as firms must adapt quickly to changes in demand and external conditions. This responsiveness is further enhanced by the agility to swiftly adjust to evolving market conditions, enabling companies to stay ahead of competitors [54,55]. Improving production lead times is another essential aspect, as reducing lead times allows firms to meet customer demand faster and more efficiently [54]. Timely product delivery that outpaces competitors is a crucial indicator, ensuring that customers receive products faster, which enhances customer loyalty and market positioning [55–58]. Furthermore, leveraging information systems to monitor all operational aspects meticulously ensures better control and transparency across the supply chain. Real-time data tracking across supplies, finished goods, equipment, and personnel provides businesses with critical insights that allow for more agile decision-making and operational efficiency [54].

Flexibility in adjusting the product mix according to market demands is another vital indicator, allowing firms to adapt their offerings to meet the shifting preferences of consumers [55,59]. A diverse range of products tailored to varied customer preferences further strengthens competitive performance by broadening market reach [53,60,61]. Additionally, meeting customer specifications for product features and technical requirements is essential for maintaining satisfaction and fostering repeat business. To ensure the highest standards, rigorous quality processes are necessary to guarantee product excellence, a key driver of long-term competitiveness [62]. Better utilisation of resources is also central to competitive performance. Maintaining minimal inventory levels of raw materials and finished goods is vital for streamlining



operations, reducing waste, and improving efficiency. Equally important is optimising production lines to ensure a balance between efficiency and flexibility, which contributes to operational excellence [63,64]. Compared to industry peers, companies that maintain low unit manufacturing costs are better positioned to compete on price while maintaining profitability. Additionally, achieving high on-time delivery performance is critical to meeting customer expectations and maintaining trust [55,57,59].

Collaboration within the supply chain is another key driver of competitive performance. Sharing proprietary information and communicating any changes that may impact supply chain partners enhances transparency and trust, which are critical for effective collaboration. Supplier participation in new product development and design processes fosters innovation and strengthens relationships, leading to more responsive and adaptive supply chains [54,55,59]. Information exchange among suppliers, customers, and other external stakeholders is essential for fostering collaboration and ensuring all parties are aligned in their goals [54]. Information sharing facilitates collaboration and improves overall supply chain efficiency [55,65,66]. Transparent data flows between supply chain members enable collaborative decision-making, which is crucial for responding to market changes and ensuring operational agility. Collaborative demand forecasting techniques further enhance coordination, allowing supply chain partners to optimise production and inventory planning, which leads to better outcomes across the supply chain [54]. Strategic advantage is a final critical area of competitive performance. High flexibility in adjusting manufacturing volume to meet market demands allows companies to respond quickly to shifts in demand, ensuring that they can capitalise on market opportunities without incurring unnecessary costs [55,59]. This flexibility is a significant competitive advantage, especially in industries like apparel, where consumer preferences can change rapidly.

In the context of competitiveness in the apparel industry, customer satisfaction remains the cornerstone for maintaining a market presence and driving business growth. The literature consistently highlights the importance of understanding and responding to customer needs, emphasising that it is advantageous and essential for survival in this highly competitive sector [67–71]. Better resource utilisation is another critical factor in achieving sustainable competitive advantage, outlined by Kleindorfer, Singhal, and Van Wassenhove [72], who advocate for optimised resource management to gain a competitive edge. The variation observed across interviews suggests strategic differences in resource management approaches, which align with the firm's resource-based view. This perspective posits that companies can leverage unique configurations of resources to achieve and maintain competitive positioning [33]. While collaboration is recognised as a strategy to enhance competitiveness, as noted by Simatupang, and Sridharan [73], its limited implementation may reflect the complexities inherent in fostering collaborative efforts within diverse supply chains. The literature underscores the necessity of integrating information and collaboration to improve product quality and reduce costs. However, the challenges of coordinating across different cultural and business environments persist [74–76]. Strategic approaches and innovation highlight the need for clearly defined strategies and ongoing innovation as critical components of competitive strategy, as Porter [77] emphasises. The relatively low emphasis on these themes suggests a gap between recognising their importance and actual implementation, a challenge frequently discussed in the literature on SC management [78]. The underemphasis on adaptability and vertical integration also indicates potential vulnerabilities. As Shukla, and Sushil Shukla and Sushil [79] argue, adaptability is vital for sustaining competitiveness in volatile markets, while vertical integration can enhance efficiency and performance in apparel SCs [80].

### Digital capabilities of the apparel industry

The apparel industry is undergoing a profound digital transformation, with information technology playing a critical role in shaping organisational capabilities and enabling cross-channel strategies that enhance competitiveness and operational efficiency [19,81]. Integrating digital technologies such as artificial intelligence, big data analytics, and the Internet of Things is revolutionising business practices across the supply chain, from product design to distribution. AI, for instance, is being leveraged to analyse consumer data, predict fashion trends, and optimise inventory management, reducing costs

and improving responsiveness to market demands [23]. Big data analytics is helping companies gain deeper insights into consumer behaviour, enabling more personalised marketing strategies and product offerings. One of the most significant developments in the apparel industry is the shift towards mass personalisation. Utilising technologies like 3D avatars and virtual prototypes, companies can offer customised products that cater to individual consumer preferences, creating a more engaging and tailored shopping experience [82]. This approach enhances customer satisfaction and reduces waste and production inefficiencies, aligning with sustainability goals. Moreover, digital printing technologies are expanding creative possibilities in apparel design, allowing for greater flexibility in production and faster response times to fashion trends [83]. Adopting these technologies has facilitated the rise of on-demand production models, which are more agile and responsive to fluctuations in consumer demand.

Retailers are also increasingly adopting various digital platforms to optimise operations and improve the customer experience. For example, lifestyle apparel retailers integrate e-commerce solutions with brick-and-mortar operations, utilising omnichannel strategies to provide seamless shopping experiences across multiple touchpoints [84]. Technologies like augmented reality and virtual reality enhance the online shopping experience, allowing customers to try on clothes before making a purchase virtually, thereby reducing return rates and improving customer satisfaction [85]. However, the pace of digitalisation varies significantly across regions, with some countries still transitioning from Industry 3.0 to Industry 4.0 [86]. Developed economies are often at the forefront of adopting advanced digital technologies, while emerging markets face challenges such as limited infrastructure, skills gaps, and resistance to change [87]. Despite these challenges, digital transformation is essential for companies to remain competitive in the rapidly evolving apparel industry. Companies that fail to embrace these technologies risk falling behind as the industry continues to prioritise speed, efficiency, and customisation.

Digitisation has transformed the apparel industry by streamlining operations, enhancing supply chain visibility, and enabling data-driven decision-making. Technologies such as product lifecycle management, digital colour management, and 3D virtual prototyping have significantly reduced time-to-market and minimised resource wastage in product development processes [88]. Moreover, digital supply chain platforms and AI-driven demand forecasting tools have enhanced agility, allowing manufacturers to respond more swiftly to market fluctuations and consumer preferences [89]. This digital shift improves operational efficiency and supports sustainability goals by enabling better planning and reducing overproduction. The emergence of the metaverse further extends the frontiers of digitisation by introducing immersive consumer experiences and new business models. In virtual environments, fashion brands can create interactive showrooms, conduct digital fashion shows, and sell virtual garments through NFTs (Non-Fungible Tokens), expanding their presence beyond physical constraints [90]. This enables brand differentiation and engages digitally native consumers who value personalised, interactive experiences. For example, platforms like Decentral and Roblox have become spaces where fashion brands such as Gucci and Nike experiment with digital-first product launches and collaborations [91]. From a manufacturing standpoint, the metaverse and extended digital ecosystems facilitate virtual sampling, remote collaboration, and 3D design integration, reducing the need for physical samples and international travel. These advancements enhance speed, reduce cost, and contribute to environmental sustainability. As the apparel industry becomes increasingly digital, the convergence of AI, virtual reality, and blockchain is expected to redefine value creation across the fashion supply chain, from product ideation to post-purchase engagement. Embracing these innovations enhances competitiveness and positions firms to thrive in a rapidly evolving digital economy.

### Digital capabilities vs competitive performance

The importance of DCs in today's trade and economic environment cannot be overstated. DC enables businesses to efficiently disseminate information, innovate in product and service design, identify new commercial opportunities, and develop adaptable and innovative corporate strategies [92]. Moreover, DC is a critical tool for enhancing CP in an ever-changing landscape [93,94]. As noted by Bhatt and Grover [93], modern IT technologies empower businesses to

respond to threats and capitalise on opportunities quickly. This organisational capability encompasses various activities, including searching, acquiring, assimilating, and applying resource knowledge and identifying and orchestrating opportunities that lead to a competitive advantage [93,95].

In another study, Dehning and Stratopoulos [96] empirically investigated the factors contributing to sustained CP through implementing DC strategies. Their research highlighted a strong correlation between managerial DC skills and long-term sustainability. However, the study found that technical DC expertise or infrastructure alone was not a source of enduring competitive advantage. Furthermore, Zhang, Lee and Zhao [97] examined the impact of DC on the CP of third-party logistics (3PL) companies in China, discovering that the nonlinear effects of digital technologies significantly influence a firm's competitive edge. Okumus [98] also emphasises that businesses can sustain CP by leveraging DC to effectively create, store, transfer, and utilise implicit and explicit knowledge. Examining the use of DC in Turkish contractor organisations, Cakmak and Tas [99] found that while most operational-level tasks using DT primarily have technical and economic implications, strategic applications of DC were limited. Although strategically employing DCs is essential for gaining a competitive edge, the evidence suggesting a significant enhancement in competitiveness remains scarce. However, the accompanying DC resource system undeniably affects a company's competitive position in the market [100].

Effectively using DC within the SC reduces lead times, optimises capacity utilisation, and enables adaptability to new market dynamics and customer expectations. These dynamics and expectations enhance the SC's ability to quickly respond to market threats and reconfigure resources as needed [101]. Additionally, trust among SC members amplifies the impact of DC-based SCA on firm performance, fostering collaborative efforts that reduce costs, improve product innovation processes, and ultimately deliver more excellent value to customers [102]. The broad adoption of DC enables SC actors to access and share vital information, which is essential for ensuring timely deliveries, increasing product customisation, enhancing customer satisfaction, and shortening product lead times. To maximise the benefits of DC deployment, management must support these efforts by providing employees with the necessary DT training. This will enhance the SC's overall value generation potential and bolster their firms' long-term competitiveness [103].

A lack of adequate measurement instruments hinders the CP of the apparel industry. Dinoka Nimali, Khatibi [104] identified significant gaps in employee-organisation congruence factors, indicating a need for better alignment in performance metrics. Narawita and Layangani [105] emphasised the importance of performance measurement systems in achieving organisational objectives. Many developing countries, including Sri Lanka, lack such systems. Perera and Perera [106] proposed a performance measurement system tailored for lean manufacturing environments, addressing the inadequacies of traditional metrics. Abeykoon and De Alwis [107] highlighted the impact of Total Quality Management practices on export performance, suggesting that quality measurement is crucial. Sivalogathan [108] linked intellectual capital to innovation capability and organisational performance. Abeysekara, Wang [54] explored supply-chain resilience's effect on performance, and Durairatnam, Chong [109] focused on quality performance determinants, underscoring the need for comprehensive measurement frameworks in the industry.

## Methodology

Pragmatism offers a solid philosophical foundation for a mixed-methods research strategy, combining qualitative and quantitative approaches. Scholars like Denscombe [110] and Mitchell and Education [111] describe pragmatism as the "philosophical spouse" of mixed research because its core principles allow for the integration of different methodologies. Pragmatism focuses on "what works," emphasising addressing real-world problems through action-oriented research [112,113]. This flexible approach allows researchers to select the best qualitative or quantitative methods to answer research questions effectively. Mixed-methods research designs, such as exploratory sequential, involve qualitative research followed by quantitative validation. These designs are well-suited for investigating complex issues like DCs and CP in industries [114,115].



This study uses a mixed-methods approach to address the apparel industry's ROs related to DCs and CP. The pragmatist paradigm underpins the methodology, allowing for the integrating of qualitative and quantitative methods. This combination capitalises on the strengths of both approaches while minimising their limitations. The exploratory sequential design (QUAL→QUAN) is employed, where qualitative methods are used to explore and identify critical dimensions, followed by quantitative methods to confirm and validate findings. This method aligns with the research goals of investigating how DCs impact CP [115]. Through this design, the study aims to explore, develop, and empirically test instruments to measure the DCs that drive competitiveness in the apparel industry.

## Research design

Semi-structured interviews were conducted as the primary data collection method, chosen for their flexibility in exploring participants' insights while allowing follow-up questions to delve deeper into specific areas of interest [116]. A purposive sampling strategy was employed to ensure that participants had significant experience and knowledge in the apparel industry, making the data collected relevant and informative [117]. Participants included high-level professionals from various roles in the apparel industry, such as Chief Information Officers (CIOs), Chief Executive Officers (CEOs), and Vice Presidents (VPs). Interviews were audio-recorded with consent and transcribed verbatim to facilitate accurate data analysis.

Eight in-depth interviews were conducted using a semi-structured, open-ended interview guide, which was refined based on feedback from academic and industry experts. Please see [Table 1](#) for interview details.

The interviews were conducted until data saturation was reached, ensuring no new information emerged from additional interviews. This study adopted inductive reasoning to develop context-specific conceptual frameworks that enrich understanding of business phenomena [118,119]. However, qualitative research faces challenges, such as ensuring sample representativeness and mitigating researcher bias [120]. To address these issues, we applied the trustworthiness framework proposed by Singh, Benmamoun, Meyr, and Arkan Singh, Benmamoun [121], focusing on four critical criteria: credibility, transferability, dependability, and confirmability. Two trained researchers conducted the coding process, achieving Krippendorff's alpha of 0.88, indicating a high level of intercoder reliability and reinforcing the robustness of the data analysis process [122]. NVivo software was used to analyse the interview transcripts, facilitating the identification of recurring themes and patterns [123]. The initial coding process involved familiarising the data, generating codes and grouping these codes into broader themes. The iterative process of reviewing and refining themes ensured that they accurately represented the underlying data. This rigorous approach enabled the researchers to answer RO1 and RO2 to identify and define critical dimensions of CP and DCs in the apparel industry, providing a preliminary measurement instrument to analyse further [124].

The quantitative phase was designed to address RO3 by developing a measurement tool. A sampling strategy is essential because collecting data from every unit within a population is impractical, and determining an appropriate

**Table 1. Interview details.**

| Interview | Date       | Designation               | Industry Experience | Mode          | Size (Employees) |
|-----------|------------|---------------------------|---------------------|---------------|------------------|
| INT - 1   | 07/08/2023 | CIO                       | 20+ years           | Online – Zoom | 60,000+          |
| INT - 2   | 17/08/2023 | VP – Sales                | 32 years            | Online – Zoom | 8500+            |
| INT - 3   | 26/08/2023 | CTO                       | 30+ years           | Online – Zoom | 110,000+         |
| INT - 4   | 18/09/2023 | Director – Transformation | 12 years            | Online – Zoom | 60,000+          |
| INT - 5   | 18/09/2023 | Director – Supply Chain   | 35+ years           | Online – Zoom | 60,000+          |
| INT - 6   | 03/10/2023 | CEO                       | 40+ years           | Online – Zoom | 12,000+          |
| INT - 7   | 27/10/2023 | VP – Operations           | 27 years            | Physical      | 8500+            |
| INT - 8   | 12/11/2023 | CEO                       | 25+ years           | Online – Zoom | 20,000+          |

<https://doi.org/10.1371/journal.pone.0325945.t001>

sample size is crucial for drawing valid conclusions from research findings, despite being one of the most challenging aspects of designing empirical research [125–127]. Recent research studies and developments suggest that researchers should use power analysis [128–132] to determine the sample size, taking into account the section of the model with the most significant number of predictors [133,134]. This study analysed power using G\*Power 3.1.9.7, a free and widely accessible software tool. With an effect size of 0.15 (medium effect), an alpha level of 0.05, and a power of 0.80, the required sample size for this study is  $n = 114$ . Fig 1 below shows the power analysis of the sample model.

Participants were recruited randomly through existing contacts to ensure a diverse and representative sample [135]. The inclusion criteria included executives, junior managers, senior managers, and directors/CEOs with experience in the apparel industry and supply chain management. Participation was entirely voluntary, with no incentives provided to ensure

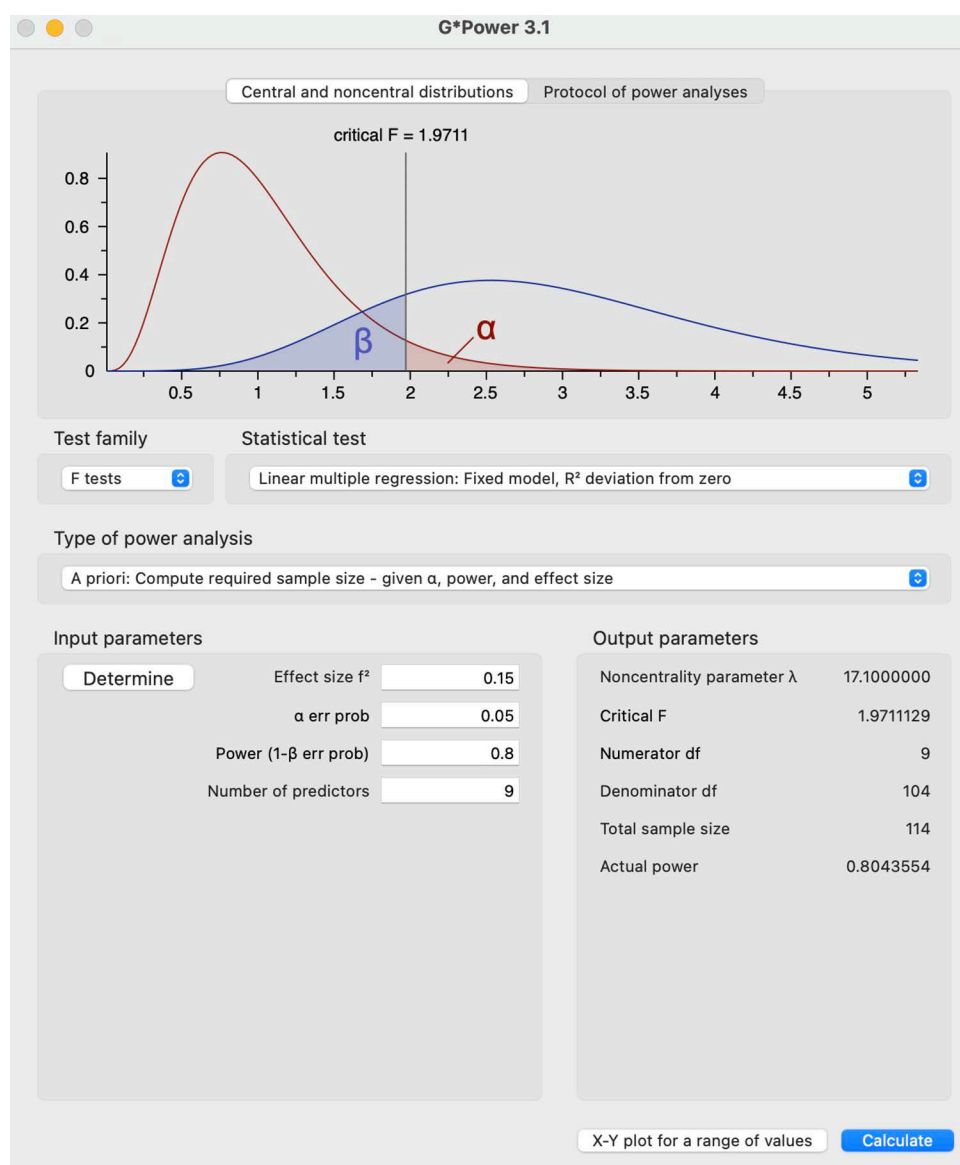

**Fig 1. Power analysis of the sample model.**

<https://doi.org/10.1371/journal.pone.0325945.g001>

the integrity and authenticity of responses [136]. This approach aligns with ethical research practices that emphasise voluntary participation and the absence of coercion [137].

A cross-sectional study was conducted using a self-administered online survey developed through Google Forms. The survey link was distributed to participants via email and WhatsApp, capitalising on the broad reach and accessibility of these platforms [138,139]. To ensure data completeness and reduce missing responses, the survey required participants to answer all questions before submission, a practice known to improve data quality in online surveys [140]. The survey was designed to be completed within 10–15 minutes, which aligns with best practices for maintaining participant engagement and optimising response rates in digital surveys [141]. Before the primary data collection, a pilot test was conducted with 23 participants to identify and resolve any potential issues in the survey design. This pilot test was carried out before distributing the final survey to the target participants [142]. The individuals involved in the pilot test were excluded from the final analysis to maintain the study's validity. A total of 123 complete responses were received for the final analysis, which was conducted using EFA and Confirmatory Factor Analysis to validate the tool.

## Qualitative analysis and discussion

This chapter presents an in-depth analysis and discussion of the qualitative data collected, shedding light on the key findings derived from the study. The chapter aims to highlight the emerging themes and patterns that provide a deeper understanding of the research questions by thoroughly examining the responses gathered through interviews and applying rigorous coding and thematic analysis techniques.

### Exploration of competitive dimensions

An in-depth analysis of the interview transcripts was conducted using NVivo for codification, identifying seven critical competitive dimensions within the apparel industry. These dimensions include customer satisfaction, innovation, facing change and uncertainty, better resource utilisation, collaboration to compete, strategic approach, and vertical advantage. Each dimension was organised into parent and child nodes, with parent nodes representing broader dimensions and child nodes acting as specific indicators of CP. The crosstab analysis, summarising the interview coding references, highlighted customer satisfaction (35.74%) and better resource utilisation (29.13%) as the most emphasised dimensions, signifying their importance in the apparel industry's competitive landscape. These findings align with existing literature on the critical role of customer satisfaction and resource optimisation in maintaining competitive advantage (67, 68).

While customer satisfaction and resource utilisation emerged as dominant themes, other dimensions, such as collaboration to compete (15.62%), strategic approaches (8.71%), and innovation (6.91%), were moderately emphasised, reflecting their ongoing relevance in enhancing competitiveness. However, facing change, uncertainty, and vertical advantage was underrepresented, indicating potential gaps in strategic implementation. This underemphasis may expose adaptability and vertical integration vulnerabilities, which are crucial for navigating volatile markets and improving SC efficiencies [79]. The study's findings suggest that focusing on customer satisfaction, resource utilisation, collaboration, innovation, and strategic orientation could serve as crucial areas for further exploration and performance measurement within the apparel SC, ultimately driving CP. Table 2 below shows the results of the heatmap of the crosstab query of CP dimensions.

Five dimensions: customer satisfaction, efficient resource utilisation, collaboration for competitiveness, innovation, and strategic orientation consistently emerged across all interviews as critical to CP. These dimensions warrant further exploration to identify specific indicators that can effectively measure their contribution to CP.

### Exploration of digital capabilities

The qualitative analysis identified two major themes of DCs: process digitalisation (PD) and technical digitalisation (TD). These themes emerged as critical factors in understanding how digital tools and technologies are leveraged to enhance

operational efficiency and drive organisational innovation. Both capabilities are pivotal in shaping an organisation's digital transformation journey and are essential for achieving sustainable CP in today's fast-paced, technology-driven environment.

**Process digitalisation.** Process digitalisation is revolutionising industries by incorporating advanced technologies like flow synthesis, automation, analytics, and real-time control. These technologies drive data-driven discovery and production protocols, significantly improving process efficiency and sustainability across various sectors [143]. In this context, Business Process Management (BPM) plays a pivotal role in translating strategic goals into actionable execution. Digitalising Process Management (PoPM) fosters continuous improvement and agility. Integrating digital technologies ranging from big data and connectivity to analytics and automation has had profound impacts, particularly in chemical and biotechnological industries [144,145]. While digitalisation opens up numerous new business opportunities, it challenges companies to develop new ideas and products more agilely [146]. A comprehensive approach to digital process automation can optimise the entire value chain, especially in intralogistics, where process efficiencies can significantly impact overall performance. Despite these advancements, many process-driven industries have yet to fully harness the potential of digitalisation [147]. Table 3 below shows the key indicators identified under process digitalisation through the qualitative study.

**Technical digitalisation.** Technical digitalisation has become a critical focus in the apparel industry, driven by the need to enhance efficiency, reduce lead times, and lower costs. Table 4 below presents the key indicators identified under technical digitalisation through a cross-tab analysis.

One of the primary areas of focus is the automation of fabric inspection systems, which are increasingly adopted to improve quality control and reduce costs associated with manual inspection [148,149]. These systems utilise advanced technologies such as image processing, machine vision, and artificial intelligence to detect fabric defects more accurately and efficiently than human inspectors [150]. Automating the inspection process also helps reduce paper waste and

**Table 2. CP dimensions crosstab query results from the heatmap.**

| Nodes                             | INT - 1 | INT - 2 | INT - 3 | INT - 4 | INT - 5 | INT - 6 | INT - 7 | INT - 8 | All    |
|-----------------------------------|---------|---------|---------|---------|---------|---------|---------|---------|--------|
| Better Utilisation of Resources   | 38%     | 26.83%  | 23.40%  | 26.09%  | 42%     | 34.48%  | 18.18%  | 18.92%  | 29.13% |
| Collaborate to Compete            | 24%     | 14.63%  | 12.77%  | 23.91%  | 12%     | 10.34%  | 9.09%   | 13.51%  | 15.62% |
| Customer Satisfaction             | 24%     | 39.02%  | 36.17%  | 41.30%  | 14%     | 34.48%  | 57.58%  | 51.35%  | 35.74% |
| Facing the Change and Uncertainty | 4%      | 0%      | 8.51%   | 0%      | 4%      | 3.45%   | 6.06%   | 0%      | 3.30%  |
| Innovation                        | 0%      | 9.76%   | 6.38%   | 6.52%   | 10%     | 10.34%  | 6.06%   | 8.11%   | 6.91%  |
| Strategic Approach                | 10%     | 7.32%   | 10.64%  | 2.17%   | 18%     | 6.90%   | 3.03%   | 8.11%   | 8.71%  |
| Vertical Advantage                | 0%      | 2.44%   | 2.13%   | 0%      | 0%      | 0%      | 0%      | 0%      | 0.60%  |

<https://doi.org/10.1371/journal.pone.0325945.t002>

**Table 3. Process digitalisation dimensions crosstab query results from the heatmap.**

| Nodes                         | INT - 1 | INT - 2 | INT - 3 | INT - 4 | INT - 5 | INT - 6 | INT - 7 | INT - 8 | Total  |
|-------------------------------|---------|---------|---------|---------|---------|---------|---------|---------|--------|
| AI and Prediction             | 37.50%  | 0%      | 15.38%  | 33.33%  | 25%     | 35.71%  | 50%     | 12.50%  | 28.57% |
| Advanced Analytics            | 62.50%  | 0%      | 38.46%  | 0%      | 16.67%  | 42.86%  | 0%      | 12.50%  | 24.68% |
| Customer and Supplier Portals | 0%      | 100%    | 15.38%  | 25%     | 8.33%   | 7.14%   | 25%     | 25%     | 16.88% |
| Demand Planning Systems       | 0%      | 0%      | 0%      | 8.33%   | 8.33%   | 7.14%   | 0%      | 12.50%  | 5.19%  |
| Inventory Management Systems  | 0%      | 0%      | 0%      | 0%      | 25%     | 7.14%   | 0%      | 25%     | 7.79%  |
| Mechanical Automation         | 0%      | 0%      | 0%      | 8.33%   | 0%      | 0%      | 0%      | 0%      | 1.30%  |
| Real-time Reliable Data       | 0%      | 0%      | 30.77%  | 25%     | 16.67%  | 0%      | 25%     | 12.50%  | 15.58% |

<https://doi.org/10.1371/journal.pone.0325945.t003>

**Table 4. Technical digitalisation dimensions crosstab query results from heatmap.**

| Nodes                     | INT - 1 | INT - 2 | INT - 3 | INT - 4 | INT - 5 | INT - 6 | INT - 7 | INT - 8 | Total  |
|---------------------------|---------|---------|---------|---------|---------|---------|---------|---------|--------|
| Digital Colour Management | 0%      | 0%      | 0%      | 0%      | 60%     | 40%     | 50%     | 0%      | 25%    |
| Digital Defects Detection | 0%      | 0%      | 0%      | 0%      | 20%     | 0%      | 0%      | 0%      | 4.17%  |
| Digital Fabric Inspection | 0%      | 0%      | 0%      | 0%      | 20%     | 40%     | 0%      | 0%      | 12.50% |
| Digital Studio            | 0%      | 25%     | 0%      | 0%      | 0%      | 0%      | 0%      | 0%      | 8.33%  |
| Virtual 3D Sampling       | 0%      | 75%     | 100%    | 100%    | 0%      | 20%     | 50%     | 100%    | 50%    |

<https://doi.org/10.1371/journal.pone.0325945.t004>

streamline data management. Automated inspection systems can provide full fabric coverage, detect a wide range of defects, and significantly lower error margins than manual methods [151].

In addition to automated inspection, three-dimensional (3D) technologies are revolutionising apparel design and product development processes. Virtual prototyping allows designers to visualise garments digitally without needing physical samples, reducing time and costs [152,153]. 3D CAD systems are advancing rapidly, integrating body models, garment design, and fabric simulations to enable more interactive and precise product development [154]. These technologies foster faster decision-making, improved communication, and enhanced sustainability by minimising material waste and inefficiencies. 3D simulations, which consider fabric properties, body contact, and geometrical nonlinearity, provide more accurate representations of garment fit and appearance [155]. Although the adoption of 3D technologies has been slow, their perceived usefulness accelerates implementation within the industry [156]. Challenges remain, particularly in the need for physical samples to assess textile properties accurately [152]. Nevertheless, 3D virtual prototyping can potentially transform the global textile and apparel industry significantly, offering new opportunities for design, development, and marketing [157].

Moreover, digital colour management has become integral to the apparel and textile industry, evolving to cover various production processes. From early computer applications in the 1950s to advanced modern systems, digital colour management enables high-fidelity image communication and precise colour specifications [158]. The industry has seen significant advancements in digital printing technology, including software development, inkjet printing, and colour management systems that improve accuracy and consistency across the supply chain [159]. Digital tools for colour management encompass measurement, simulation, and quality control, ensuring that stringent colour tolerances are maintained throughout the textile manufacturing [160,161].

## Instrument development

The research team developed the tool following the recommended process outlined by Davis [162]. The process included the following steps: (1) identifying the tool concept through thorough qualitative research and a comprehensive literature review; (2) determining the formatting, writing, scoring, and comprehensibility of the tool; (3) conducting validity tests with an expert panel to assess the relevance and clarity of the questionnaire; (4) testing the reliability and validity of the data; and (5) performing factor analyses, including both CFA and EFA.

The identified indicators through the qualitative study were validated through an extensive literature review. Table 5 below presents the indicators identified through this qualitative research and subsequent literature review.

## Content validity

The research team engaged with 12 industry experts in Sri Lanka to validate the clarity and relevance of the instrument. Content validity was assessed using a Content Validity Index (CVI), where experts rated each item on a 4-point scale (1 = not relevant to 4 = highly appropriate). The degree of agreement on the relevance of the items was measured using the modified kappa coefficient, following the guidelines established by Polit, Beck [163]. Tilden, Nelson [164] and Gilbert



**Table 5. Dimensions and indicators.**

| Dimensions                           | No    | Indicators                                                                                                                             | Reference  | Source                        |
|--------------------------------------|-------|----------------------------------------------------------------------------------------------------------------------------------------|------------|-------------------------------|
| CSA: Customer Satisfaction           | CSA1  | Competitive unit price                                                                                                                 | [52,53]    | Qualitative Study/ Literature |
|                                      | CSA2  | Consistently seek opportunities to optimise our pricing structure to serve customers better.                                           | [52,53]    | Qualitative Study/ Literature |
|                                      | CSA3  | Responsive to market dynamics and emerging opportunities.                                                                              | [54,55]    | Qualitative Study/ Literature |
|                                      | CSA4  | Agility to swiftly adapt to evolving market conditions                                                                                 | [54,55]    | Qualitative Study/ Literature |
|                                      | CSA5  | Continuously improving production lead times.                                                                                          | [54]       | Qualitative Study/ Literature |
|                                      | CSA6  | Delivering products promptly, outpacing competitors in speed of delivery.                                                              | [55–58]    | Qualitative Study/ Literature |
|                                      | CSA7  | Information systems meticulously monitor all operational aspects.                                                                      | [54]       | Qualitative Study/ Literature |
|                                      | CSA8  | Real-time data tracking across supplies, finished goods, equipment, and personnel.                                                     | [54]       | Qualitative Study/ Literature |
| BUR: Better Utilisation of Resources | CSA9  | Flexibility in adjusting product mix according to market demands.                                                                      | [55,59]    | Qualitative Study/ Literature |
|                                      | CSA10 | A diverse range of products to cater to varied customer preferences.                                                                   | [53,60,61] | Qualitative Study/ Literature |
|                                      | CSA11 | Meet customer specifications for product features and technical requirements.                                                          | [62]       | Qualitative Study/ Literature |
|                                      | CSA12 | Rigorous quality standards and processes to ensure product excellence.                                                                 | [62]       | Qualitative Study/ Literature |
|                                      | BUR1  | Ongoing training to develop cutting-edge skills in the workforce                                                                       |            | Qualitative Study             |
|                                      | BUR2  | Continuous learning and development of organisational culture                                                                          |            | Qualitative Study             |
|                                      | BUR3  | Advanced forecasting tools to effectively manage and optimise resource capacity.                                                       |            | Qualitative Study             |
|                                      | BUR4  | The ability to forecast shifts in the supply chain allows for agile resource reallocation.                                             |            | Qualitative Study             |
| CTC: Collaboration to Compete        | BUR5  | Maintain minimal inventory levels of raw materials and finished goods to streamline operations.                                        | [63,64]    | Qualitative Study/ Literature |
|                                      | BUR6  | Production lines are finely tuned for optimal balance and efficiency.                                                                  | [63,64]    | Qualitative Study/ Literature |
|                                      | BUR7  | Low unit manufacturing costs compared to industry peers.                                                                               | [55,57,59] | Qualitative Study/ Literature |
|                                      | BUR8  | Achieve high levels of on-time delivery performance.                                                                                   | [55,57,59] | Qualitative Study/ Literature |
|                                      | BUR9  | Investments in renewable energy sources to enhance resource sustainability.                                                            |            | Qualitative Study             |
|                                      | BUR10 | Re-use and recycling methods to maximise resource utilisation efficiency.                                                              |            | Qualitative Study             |
|                                      | CTC1  | Share proprietary information and communicate events or changes (production, financial, design) that may impact supply chain partners. | [54,55,59] | Qualitative Study/ Literature |
|                                      | CTC2  | Supplier's participation in new product development and design processes.                                                              | [54,55,59] | Qualitative Study/ Literature |
|                                      | CTC3  | Information exchange among suppliers, customers, and other external stakeholders to foster collaboration.                              | [54]       | Qualitative Study/ Literature |
|                                      | CTC4  | Information sharing to facilitate collaborations with supply chain partners.                                                           | [55,65,66] | Qualitative Study/ Literature |
| CTC5                                 | CTC5  | Joint ventures or partnerships with supply chain actors to maximise strategic advantages                                               |            | Qualitative Study             |
|                                      | CTC6  | Data flows transparently between supply chain members, with full access for all firms to facilitate collaborative decision-making.     | [54]       | Qualitative Study/ Literature |
|                                      | CTC7  | Collaborative demand forecasting techniques with supply chain partners to enhance coordination and efficiency.                         | [54]       | Qualitative Study/ Literature |

(Continued)

**Table 5.** (Continued)

| Dimensions                   | No   | Indicators                                                                                            | Reference | Source                        |
|------------------------------|------|-------------------------------------------------------------------------------------------------------|-----------|-------------------------------|
| STA: Strategic Advantage     | STA1 | Global geographical positioning provides a strategic advantage over competitors.                      |           | Qualitative Study             |
|                              | STA2 | High flexibility in adjusting manufacturing volume to meet market demands.                            | [55,59]   | Qualitative Study/ Literature |
|                              | STA3 | Leveraging trade agreements such as GSP, AGOA, etc., provides us with a strategic advantage.          |           | Qualitative Study             |
|                              | STA4 | The visionary leadership                                                                              |           | Qualitative Study             |
| PD: Process Digitalisation   | PD1  | AI and advanced prediction technologies                                                               |           | Qualitative Study             |
|                              | PD2  | Advanced analytics to drive business decision-making processes.                                       |           | Qualitative Study             |
|                              | PD3  | Utilises customer and supplier portals for seamless order placement, payments, and communication.     |           | Qualitative Study             |
|                              | PD4  | Leveraging advanced demand planning technologies to plan sales and production capacities.             |           | Qualitative Study             |
| TD: Technical Digitalisation | PD5  | Inventory management systems are used to optimise inventory and material handling.                    |           | Qualitative Study             |
|                              | PD6  | Automation across operations to streamline processes.                                                 |           | Qualitative Study             |
|                              | PD7  | Real-time data capture systems are integral to enhancing and expediting decision-making processes     |           | Qualitative Study             |
|                              | TD1  | Advanced colour management technologies to precisely match thread, fabric shades, and other elements. |           | Qualitative Study             |
|                              | TD2  | Quality processes are enhanced with digital defect identification capabilities.                       |           | Qualitative Study             |
|                              | TD3  | Digital fabric inspection is integral to quality control measures.                                    |           | Qualitative Study             |
|                              | TD4  | Digital studios to showcase products to customers effectively.                                        |           | Qualitative Study             |
|                              | TD5  | Virtual 3D sampling capabilities in product development.                                              |           | Qualitative Study             |
|                              |      |                                                                                                       |           |                               |

<https://doi.org/10.1371/journal.pone.0325945.t005>

and Prion [165] suggest that items with CVI values exceeding 0.70 are generally accepted; however Davis [166], recommends a CVI exceeding 0.80 as preferable. According to Perreault and Leigh [167], Kappa values  $\leq 0$  indicate no agreement, 0.01–0.20 indicate slight agreement, 0.21–0.40 indicate fair agreement, 0.41–0.60 indicate moderate agreement, 0.61–0.80 indicate substantial agreement, and 0.81–1.00 indicate almost perfect agreement. Consequently, this study eliminated items with CVI and Kappa values below 0.80 to ensure high content validity and agreement. Table 6 below shows the items that did not pass the threshold and were removed from the instrument.

The developed tool comprised three main sections: participants' demographic information, perceptions of the organisation's CP, and perceptions of digital technological capabilities. The first section included items on organisation size, participants' positions, and length of industry experience. These items were designed as a mix of open-ended and multiple-choice questions. The second and third sections comprised 36 items in total, addressing six key factors.

The Likert scale was selected for this study due to its widespread use in SEM applications [168]. There is ongoing debate among scholars regarding the ideal number of scale points and whether to use an even or odd number. According to Taherdoost [169], the validity and reliability of responses improve with a more extensive point scale, ideally between 7 and 11 points. Many studies incorporate a "neutral" midpoint in the Likert scale to account for respondents who may not have strong opinions. He, Van de Vijver [170] notes that cultural factors can influence how often individuals select middle response options.

Furthermore, people with lower socioeconomic status and education levels are more prone to acquiescence bias [171,172]. In Asian cultures, participants are likelier to choose the middle point or remain neutral, potentially leading to suboptimal results [173]. Considering this context and the study's location in Sri Lanka, an 8-point Likert scale was utilised.

## Exploring the measurement scale: EFA

In this research, EFA was conducted using Varimax rotation, an orthogonal rotation strategy. Orthogonal rotations like Varimax are suitable when the primary goal is obtaining an interpretable and straightforward structure without assuming the factors are correlated. Varimax rotation maximises the variance of squared loadings of a factor matrix, simplifying interpretation by producing factors that are as distinct as possible [174]. Previous studies have demonstrated that Varimax rotation effectively clarifies factor structures, making it a widely accepted method in various fields. The selection of orthogonal rotation (Varimax) was guided by both empirical results and the objective of achieving a simplified and interpretable factor structure. Although digital capabilities and competitive performance are theoretically interlinked, an empirical test using oblique rotation (Promax) revealed relatively low inter-factor correlations (below 0.3), suggesting that the latent constructs are sufficiently distinct in the context of this study. According to Hair et al. [129], orthogonal rotation is suitable when factor correlations are low, as it produces uncorrelated factors that are easier to interpret and compare across studies [129]. Additionally, orthogonal rotation helps reduce multicollinearity among factors, which is beneficial when proceeding to subsequent analyses like CFA or SEM [175]. Given the objective of developing a validated and practically applicable measurement instrument, Varimax rotation allowed us to extract clean factor loadings with minimal cross-loadings, enhancing the clarity and utility of the resulting constructs.

**Table 6. Items removed from the instrument at content validation.**

| Dimensions                           | Items Removed                |
|--------------------------------------|------------------------------|
| CSA: Customer Satisfaction           | CSA3, CSA4, CSA7, CSA8, CSA9 |
| BUR: Better Utilisation of Resources | BUR1, BUR4, BUR8             |
| CTC: Collaboration to Compete        | CTC1                         |

<https://doi.org/10.1371/journal.pone.0325945.t006>

The factor loading criteria were set at 0.50, ensuring that each item significantly contributes to its respective factor [176]. Additionally, the commonality of the scale, indicating the amount of variance explained by each factor, was assessed to ensure acceptable levels of explanation. The results showed that all communalities exceeded 0.50, indicating a solid reason for variance. Bartlett's Test of Sphericity was employed to determine the overall significance of the correlation matrix, providing a measure of the statistical probability that significant correlations exist among the matrix components. The results were substantial,  $\chi^2$  ( $n=123$ ) = 6084.675 ( $p<0.000$ ), indicating the suitability of the data for factor analysis [177,178]. Additionally, the Kaiser–Meyer–Olkin (MSA) measure of sampling adequacy was calculated, yielding a value of 0.853. Data with MSA values above 0.800 are highly suitable for factor analysis [178]. The criteria for item deletion in this research were based on established guidelines in the literature. According to Costello and Osborne [179], high factor loadings greater than 0.70 indicate strong relationships between items and their underlying factors, thereby enhancing the reliability and interpretability of the scale. Furthermore, cross-loading items can obscure factor definitions and lead to ambiguous results, justifying their removal when cross-loadings exceed 0.32 [180]. Therefore, items with loadings less than 0.70 were removed to ensure each item significantly contributed to its respective factor. Additionally, items with cross-loadings greater than 0.32 on at least two factors were considered for deletion, mainly if other items had factor loadings of 0.50 or higher. This approach aligns with recommendations to enhance the clarity and distinctiveness of the factors [174,179].

The factor solution derived from this analysis yielded six factors, accounting for 83.104 per cent of the variance in the data. However, in this initial EFA, two items failed to meet the criteria for retention. Specifically, item PD1: "We harness AI and advanced prediction technologies to inform our strategies" did not load significantly on any dimension, and item PD2: "Advanced analytics drive our business decision-making processes" loaded onto a factor other than its intended one. Consequently, these two items were removed from further analysis to ensure the integrity and validity of the factor structure.

The authors conducted the EFA again, excluding the previously identified items. The results of this revised analysis confirmed the six-dimensional structure as theoretically defined in the research. The results in Table 7 revealed six factors explaining a significant proportion of the variance in the data.

The initial eigenvalues indicated that these six factors accounted for 83.104% of the total variance. Specifically, Factor 1 explained 28.647% of the variance, Factor 2 explained 21.329%, Factor 3 explained 12.043%, Factor 4 explained 9.220%, Factor 5 explained 6.465%, and Factor 6 explained 5.400%. The cumulative variance explained by these six factors after rotation was 83.104%, demonstrating a robust factor structure [174,176].

Bartlett's Test of Sphericity was significant,  $\chi^2$  ( $n=123$ ) = 5693.700 ( $p<0.000$ ), confirming the presence of adequate correlations among the items, and all communalities exceeded the required value of 0.500, ensuring robust explanatory power. Table 8 below shows the rotated component matrix.

Relying solely on the eigenvalue > 1 rule is insufficient, as it has been demonstrated to be one of the least accurate methods for assessing factor retention [179]. Therefore, parallel analysis was conducted to provide a more robust evaluation. For an item to be retained, the acceptable eigenvalue must be greater than one [181,182]. Patil, Surendra [183] was

**Table 7. EFA total variance explained.**

| Component | Initial Eigenvalues % of the variance | Cumulative % | Rotation Sums of Squared Loadings % of variance | Cumulative % |
|-----------|---------------------------------------|--------------|-------------------------------------------------|--------------|
| 1         | 26.568                                | 26.568       | 17.699                                          | 17.699       |
| 2         | 22.563                                | 49.131       | 15.336                                          | 33.035       |
| 3         | 12.752                                | 61.882       | 14.842                                          | 47.877       |
| 4         | 9.720                                 | 71.602       | 13.229                                          | 61.106       |
| 5         | 6.841                                 | 78.443       | 12.100                                          | 73.206       |
| 6         | 5.643                                 | 84.086       | 10.880                                          | 84.086       |

<https://doi.org/10.1371/journal.pone.0325945.t007>

**Table 8. Rotated Component Matrix loadings.**

| Items | Component |       |       |       |       |       |
|-------|-----------|-------|-------|-------|-------|-------|
|       | 1         | 2     | 3     | 4     | 5     | 6     |
| CSA1  | 0.933     |       |       |       |       |       |
| CSA2  | 0.929     |       |       |       |       |       |
| CSA5  | 0.920     |       |       |       |       |       |
| CSA6  | 0.851     |       |       |       |       |       |
| CSA10 | 0.922     |       |       |       |       |       |
| CSA11 | 0.897     |       |       |       |       |       |
| CSA12 | 0.897     |       |       |       |       |       |
| BUR2  |           | 0.750 |       |       |       |       |
| BUR3  |           | 0.886 |       |       |       |       |
| BUR5  |           | 0.864 |       |       |       |       |
| BUR6  |           | 0.857 |       |       |       |       |
| BUR7  |           | 0.768 |       |       |       |       |
| BUR9  |           | 0.865 |       |       |       |       |
| BUR10 |           | 0.855 |       |       |       |       |
| CTC2  |           |       | 0.883 |       |       |       |
| CTC3  |           |       | 0.899 |       |       |       |
| CTC4  |           |       | 0.888 |       |       |       |
| CTC5  |           |       | 0.858 |       |       |       |
| CTC6  |           |       | 0.800 |       |       |       |
| CTC7  |           |       | 0.766 |       |       |       |
| STA1  |           |       |       |       |       | 0.893 |
| STA2  |           |       |       |       |       | 0.895 |
| STA3  |           |       |       |       |       | 0.892 |
| STA4  |           |       |       |       |       | 0.899 |
| PD3   |           |       |       | 0.930 |       |       |
| PD4   |           |       |       | 0.925 |       |       |
| PD5   |           |       |       | 0.915 |       |       |
| PD6   |           |       |       | 0.926 |       |       |
| PD7   |           |       |       | 0.759 |       |       |
| TD1   |           |       |       |       | 0.924 |       |
| TD2   |           |       |       |       | 0.883 |       |
| TD3   |           |       |       |       | 0.822 |       |
| TD4   |           |       |       |       | 0.925 |       |
| TD5   |           |       |       |       | 0.887 |       |

Extraction Method: Principal Component Analysis. Rotation Method: Varimax with Kaiser Normalisation.

<https://doi.org/10.1371/journal.pone.0325945.t008>

utilised to calculate the eigenvalues from randomly generated correlation matrices. These random eigenvalues were then compared with those extracted from the research dataset. The number of factors to retain corresponds to the number of eigenvalues from the researcher's dataset that exceed the random eigenvalues [184]. The scree plot in Fig 2 indicated six factors to retain.

The six factors identified through the EFA aligned with the theoretical propositions of the research. Factor 1 represents Customer Satisfaction (CSA). Factor 2 represents Better Utilisation of Resources. Factor 3 pertains to Collaboration to



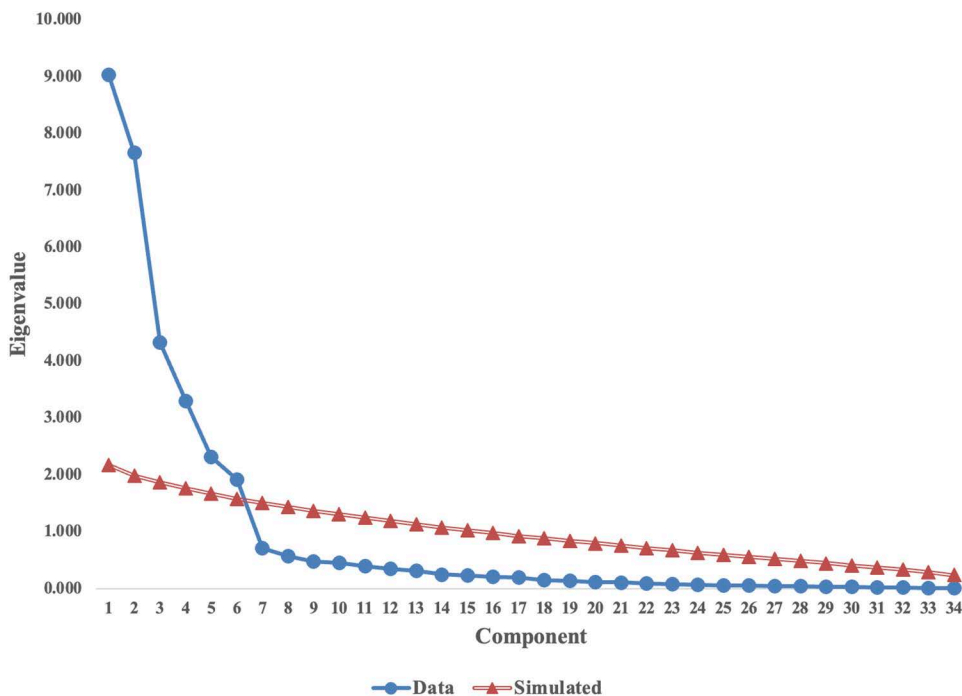

**Fig 2. Parallel analysis scree plot.**

<https://doi.org/10.1371/journal.pone.0325945.g002>

Compete (CTC). Factor 4 represents Strategic Advantage (STA). Factor 5 pertains to Process Digitalisation (PD). Finally, Factor 6 represents Technical Digitalisation.

### Confirmatory factor analysis

Researchers and reviewers must independently evaluate the results obtained in an EFA study. This should occur on two levels: first, independent researchers should assess the analytic choices made by the authors, considering the many subjective decisions involved in EFA. Second, they should be able to replicate the study accurately using new data or conduct a CFA to verify the findings [185]. Therefore, in this study, CFA was employed to ensure the robustness of the findings.

**Normality and reliability of data.** First, the researchers tested the normality of the data and internal consistency using SPSS software. According to Kline [130], absolute skewness values greater than 3.0 indicate an extremely skewed distribution, absolute kurtosis values greater than 10.0 suggest a problem, and values exceeding 20.0 indicate a potentially serious issue with Kurtosis. As shown in Table 9, the skewness and kurtosis values of the dataset were well within these acceptable ranges, indicating that the sample data is normally distributed.

Cronbach's alpha was calculated to assess the scale's internal consistency and reliability. For the 36-item full scale, Cronbach's alpha was 0.903, demonstrating excellent internal consistency [186]. Similarly, each subscale showed alpha values greater than 0.90, supporting the instrument's reliability. These findings confirm that the data are typically distributed and internally consistent, making them suitable for further analysis.

**First-order model CFA results.** The CFA was conducted to assess the validity of the measurement model. The results, including factor loadings and model fit indices, provide insights into the model's adequacy and areas for improvement. The standardised estimates produced by Amos, using Maximum Likelihood (ML) estimation to handle missing data, are presented in Fig 3.

**Table 9. Skewness, Kurtosis, and Cronbach's alpha values.**

| Items by Subscale               | Max | Min | Mean | Skewness | Kurtosis | Cronbach's Alpha |
|---------------------------------|-----|-----|------|----------|----------|------------------|
| Customer Satisfaction           |     |     |      |          |          | 0.971            |
| CSA1                            | 4   | 8   | 7.19 | -1.063   | -0.305   |                  |
| CSA2                            | 4   | 8   | 7.13 | -1.063   | -0.294   |                  |
| CSA5                            | 4   | 8   | 7.11 | -1.114   | -0.036   |                  |
| CSA6                            | 4   | 8   | 6.89 | -0.652   | -0.629   |                  |
| CSA10                           | 4   | 8   | 6.88 | -0.778   | -0.375   |                  |
| CSA11                           | 4   | 8   | 6.74 | -0.594   | -0.455   |                  |
| CSA12                           | 4   | 8   | 6.82 | -0.681   | -0.363   |                  |
| Better Utilisation of Resources |     |     |      |          |          | 0.937            |
| BUR2                            | 2   | 7   | 5.28 | -1.61    | 2.936    |                  |
| BUR3                            | 3   | 7   | 5.98 | -0.786   | -0.38    |                  |
| BUR5                            | 4   | 7   | 5.85 | -0.333   | -1.022   |                  |
| BUR6                            | 3   | 7   | 5.89 | -0.569   | -0.331   |                  |
| BUR7                            | 2   | 6   | 5.04 | -0.835   | 0.25     |                  |
| BUR9                            | 2   | 7   | 5.98 | -0.787   | 0.716    |                  |
| BUR10                           | 1   | 6   | 4.39 | -1.507   | 2.897    |                  |
| Collaborate to Compete          |     |     |      |          |          | 0.949            |
| CTC2                            | 3   | 7   | 5.07 | -0.555   | -0.631   |                  |
| CTC3                            | 2   | 7   | 4.36 | 0.009    | -1.012   |                  |
| CTC4                            | 1   | 6   | 3.39 | 0.085    | -0.999   |                  |
| CTC5                            | 2   | 5   | 3.92 | -0.84    | -0.532   |                  |
| CTC6                            | 1   | 5   | 2.5  | 0.025    | -1.247   |                  |
| CTC7                            | 1   | 4   | 2.38 | -0.005   | -1.24    |                  |
| Strategic Advantage             |     |     |      |          |          | 0.979            |
| STA1                            | 2   | 6   | 4.8  | -0.372   | -0.803   |                  |
| STA2                            | 1   | 5   | 3.78 | -0.364   | -0.759   |                  |
| STA3                            | 3   | 7   | 5.76 | -0.83    | 0.197    |                  |
| STA4                            | 3   | 7   | 5.4  | -0.259   | -1.331   |                  |
| Process Digitalisation          |     |     |      |          |          | 0.966            |
| PD3                             | 2   | 5   | 3.87 | -0.456   | -0.336   |                  |
| PD4                             | 2   | 5   | 3.85 | -0.405   | -0.438   |                  |
| PD5                             | 4   | 7   | 5.73 | -0.439   | -0.008   |                  |
| PD6                             | 3   | 6   | 4.79 | -0.469   | -0.036   |                  |
| PD7                             | 2   | 7   | 3.86 | 0.239    | 0.123    |                  |
| Technical Digitalisation        |     |     |      |          |          | 0.932            |
| TD1                             | 1   | 5   | 2.8  | 0.085    | 0.114    |                  |
| TD2                             | 1   | 4   | 1.93 | 0.603    | -0.102   |                  |
| TD3                             | 1   | 3   | 2.07 | 0.154    | 1.011    |                  |
| TD4                             | 3   | 6   | 4.63 | -0.464   | -0.386   |                  |
| TD5                             | 3   | 6   | 4.6  | -0.27    | -0.78    |                  |

<https://doi.org/10.1371/journal.pone.0325945.t009>

The factor loadings for the observed variables on their respective latent constructs are robust, ranging from 0.59 to 0.99. These high factor loadings suggest that the observed variables are strong indicators of their underlying constructs, contributing positively to the overall measurement model. Generally, factor loadings above 0.70 are considered very good, while loadings above 0.50 are acceptable for exploratory models [187]. In this analysis, most factor loadings exceed 0.70, affirming the reliability and validity of the constructs.

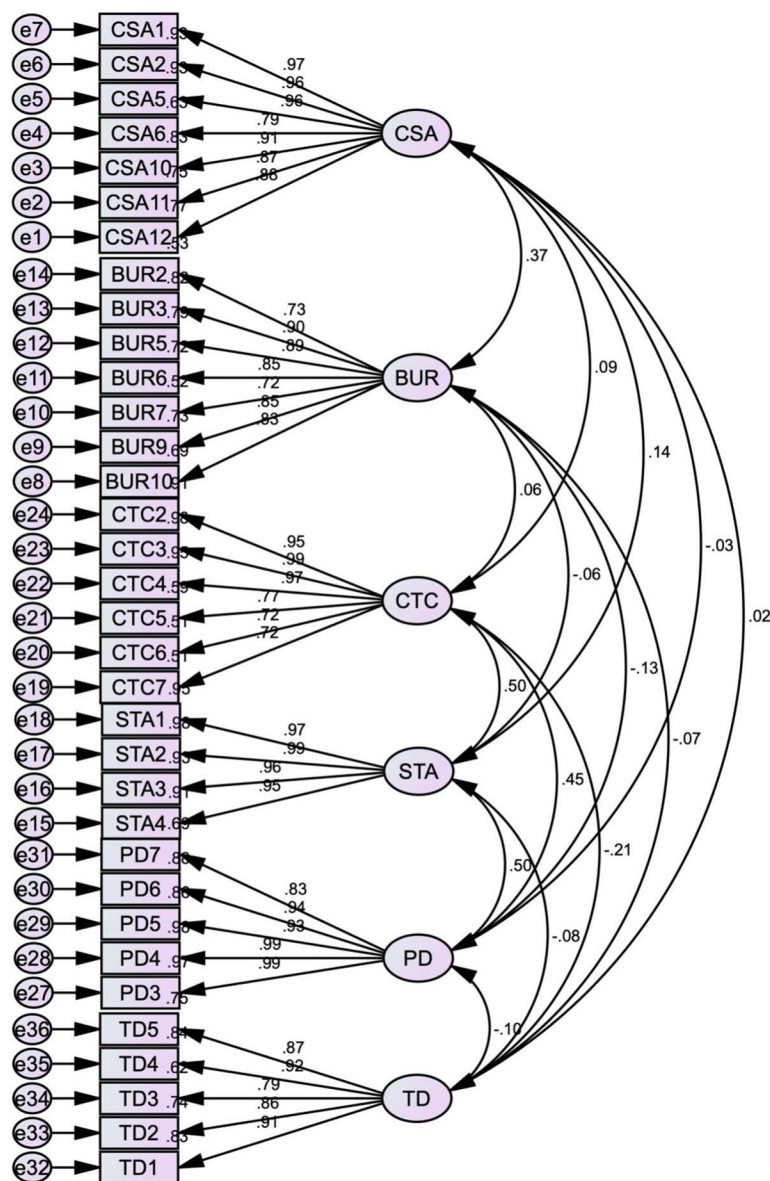

Fig 3. First-order initial CFA model.

<https://doi.org/10.1371/journal.pone.0325945.g003>

The overall model fit was evaluated using several indices, providing a comprehensive assessment of the model's suitability. CMIN/DF was 2.082 ( $p < 0.05$ ), which falls within the acceptable range of 2–5, indicating a reasonable fit of the model to the data [188]. This suggests that the model appropriately represents the observed data, though the ratio alone should not be relied upon without considering other fit indices. GFI and AGFI were 0.669 and 0.615, respectively. These values are below the recommended threshold of 0.90, indicating that the model could be improved [189]. The relatively low GFI and AGFI values suggest that the model does not achieve an optimal fit, possibly due to model complexity or sample size. The NFI, IFI, TLI, and CFI were 0.831, 0.905, 0.895, and 0.902, respectively. These indices are close to the acceptable threshold of 0.90, indicating that the model reasonably explains the variance and covariance among the variables [190]. Although not ideal, these values suggest that the model moderately fits the data. RMSEA was 0.094, with

a 90% confidence interval ranging from 0.086 to 0.102. This value exceeds the generally accepted threshold of 0.08, suggesting that the model has some degree of misfit [191]. A higher RMSEA value indicates that the model could be further refined to fit the data better. The AIC for the default model was 1231.908, significantly lower than that of the independence model (6392.413), suggesting that the hypothesised model is more appropriate [192]. The ECVI for the default model was 10.098, much lower than that of the independence model (52.397), indicating that the model is likely to perform better with new data. Hoelter's Critical N for the default model was 65 at the 0.05 significance level, indicating that the sample size is marginally sufficient for detecting the model's structure [193]. A larger sample size might provide more stable and reliable estimates.

Due to the initial model's suboptimal fit, the researchers considered modifications based on modification indices (MI) and the examination of residuals. This approach is commonly recommended in structural equation modelling (SEM) when the initial model fit is inadequate [189]. The model was iteratively tested by removing eight items, CSA6, BUR2, BUR10, CTC6, CTC7, PD1, PD2, and PD7, which exhibited high standardised residual values that exceeded acceptable thresholds [194].

Additionally, covariances were added between specific error terms where high MI suggested that doing so would improve model fit. Specifically, covariances were added between the following pairs of error terms: e1 - e2, e1 - e3, e2 - e3, e9 - e10, e21 - e24, e29 - e30, e32 - e33.

The modified model, as shown in the updated CFA diagram and the corresponding model fit indicators, demonstrates significant improvement in fit compared to the initial model. Fig 4 below presents the standardised estimates of the adjusted first-order model, calculated using ML estimation, along with the updated model fit indices, which show an improved fit after these modifications.

The standardised estimates for the factor loadings in the modified model remain strong, with values ranging from 0.62 to 0.99. These high loadings suggest that the observed variables are strong indicators of their respective latent constructs, contributing positively to the overall measurement model. Removing the previously problematic items has likely contributed to a more stable and reliable factor structure.

The CMIN/DF ratio for the modified model is 1.183 ( $p < 0.05$ ), which is well within the acceptable range of 1–3, indicating an excellent fit between the model and the observed data. This is a significant improvement from the initial model, suggesting that the modifications made to the model were effective. RMR is 0.037, which is low, indicating a good fit. GFI is 0.827, and the AGFI is 0.786. While GFI and AGFI are slightly below the commonly accepted threshold of 0.90, they still indicate a reasonably good fit, considering the complexity of the model and the sample size. NFI is 0.927, the IFI is 0.988, the TLI is 0.986, and the CFI is 0.988. These indices are above the recommended threshold of 0.90, indicating that the model fits the data exceptionally well. These high values further confirm the effectiveness of the modifications. RMSEA is 0.039, with a 90% confidence interval ranging from 0.019 to 0.053. An RMSEA below 0.05 indicates a close fit of the model with the degrees of freedom.

Additionally, the PCLOSE value of 0.893 suggests that the probability of the RMSEA being below 0.05 is high, further supporting the model's adequacy. The AIC for the modified model is 544.135, significantly lower than that of the independence model (5362.23), indicating that the modified model is far superior in explaining the data. The ECVI is 4.46, which is lower than that of both the saturated and independent models, suggesting that the modified model would better predict new data. Hoelter's Critical N is 117 at the 0.05 significance level, indicating that the sample size is adequate for detecting the model's structure. This value is much higher than the critical N of the independence model, further affirming the adequacy of the modified model.

**Second-order model CFA results.** This study employed a second-order CFA model to assess the relationships among multiple latent constructs. The Generalised Least Squares (GLS) method was chosen for parameter estimation due to its superior ability to handle the complexities inherent in second-order models, such as heteroscedasticity, correlated errors, and potential deviations from multivariate normality [130,191,195]. Fig 5 below presents the

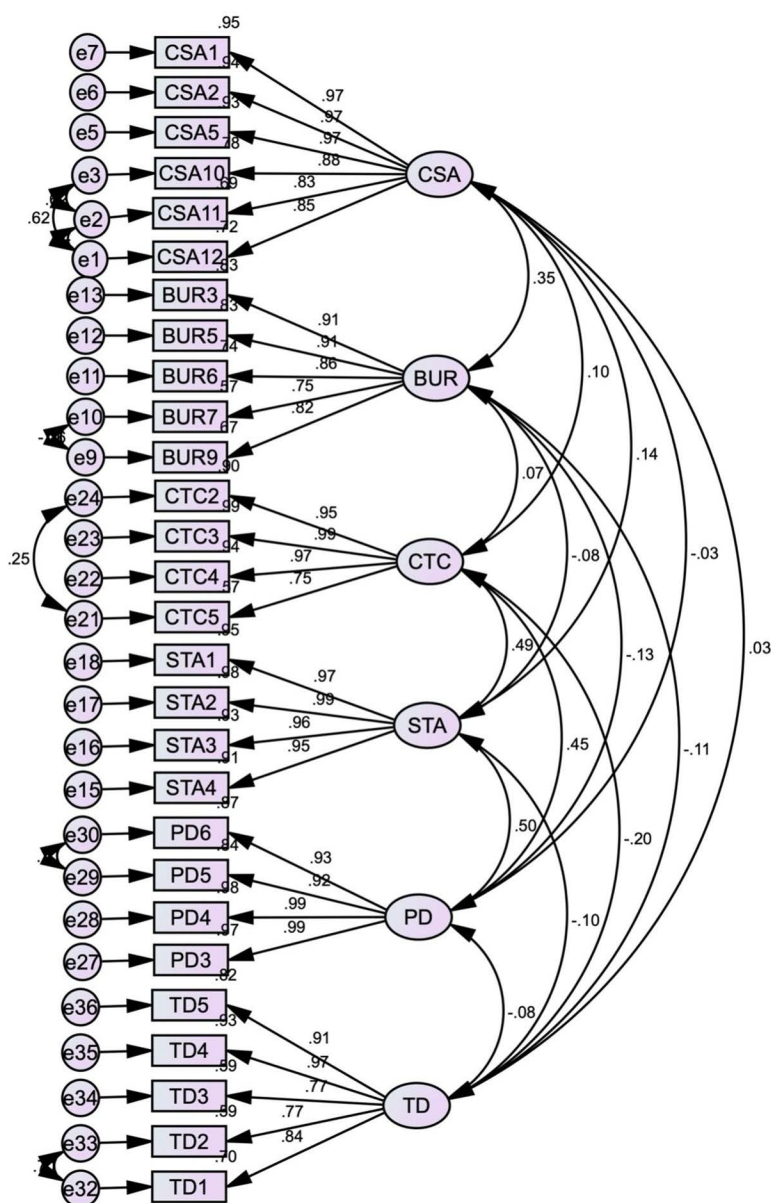

Fig 4. First order final model.

<https://doi.org/10.1371/journal.pone.0325945.g004>

standardised estimates of the adjusted first-order model, calculated using GLS estimation, along with the updated model fit indices, which show an improved fit after these modifications.

In the second-order CFA model, the first-order latent constructs (CSA, BUR, CTC, STA, PD, and TD) load onto higher-order constructs (CP and DC). The factor loadings for the observed variables on their respective first-order constructs remain strong, ranging from 0.60 to 1.00. This indicates that the observed variables are well represented by their respective latent constructs. Additionally, the second-order loadings show a strong relationship between the first-order constructs and the overarching factors CP and DC. For instance, PD and TD show strong loadings onto DC, underscoring the importance of digital processes and technical digitalisation in the broader construct of DCs.



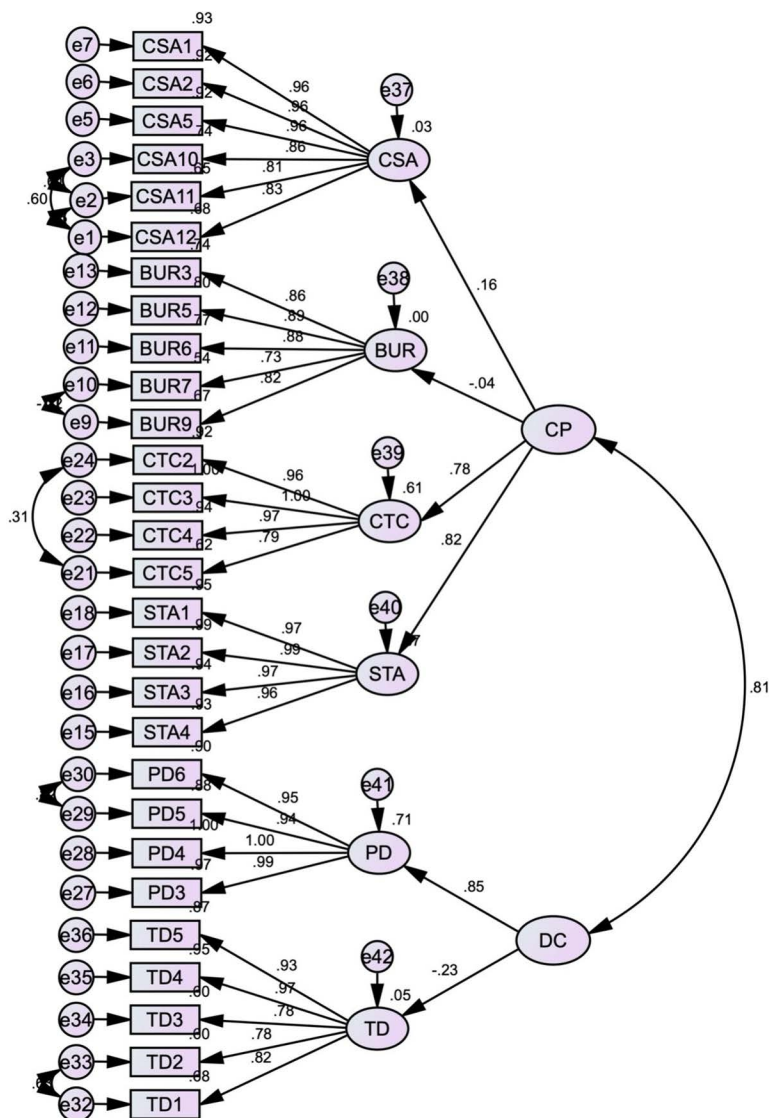

Fig 5. Second-order final model.

<https://doi.org/10.1371/journal.pone.0325945.g005>

The CMIN/DF ratio for the default model is 0.989 ( $p > 0.05$ ), which is below 1, indicating an excellent fit. A CMIN/DF value close to or below two is typically considered a sign of a well-fitting model. RMR is 0.189, which suggests a reasonably good fit, though not ideal. The GFI is 0.806, and the AGFI is 0.765, both of which are slightly below the recommended threshold of 0.90 but still indicate a reasonable fit considering the complexity of the model. The NFI is 0.499, below the recommended threshold of 0.90, indicating a moderate fit. However, the IFI, TLI, and CFI are around 1.0 (IFI = 1.012, TLI = 1.015, CFI = 1.0), indicating a perfect fit. These high values suggest that the model fits the data well compared to a baseline model. The RMSEA for the default model is 0, with a 90% confidence interval ranging from 0 to 0.032. This exceptionally low RMSEA indicates a close fit between the model and the observed data. Additionally, the PCLOSE value of 1 indicates a high probability that the RMSEA is below 0.05, further supporting the model's adequacy. The AIC for the default model is 472.173, significantly lower than that of the independence model (718.492), indicating that the default model is better suited for explaining the data. The ECVI is 3.87, lower than the saturated and independent models,

suggesting that the default model would better predict new data. Hoelter's Critical N is 140 at the 0.05 significance level, indicating that the sample size is adequate for detecting the model's structure. This value is much higher than the critical N of the independence model, further affirming the adequacy of the modified model. The overall fit indices strongly support the validity and reliability of the model. The substantial factor loadings and well-fitting higher-order constructs confirm the theoretical underpinnings of the model, providing a solid basis for further research and application.

### Determine the best model

When using SEM, constructing a single model is the most straightforward approach. However, it is often insufficient to analyse only one model. Instead, it is more appropriate to assess multiple competing models and compare the results to understand better and identify the best-fitting model for the data [196]. Different models can be compared regarding their fit by performing a chi-square ( $\chi^2$ ) difference test. This test enables researchers to determine whether one model fits the data significantly better or worse than a competing model. Whether both models are equivalent can be tested using the following hypothesis.

$$H_0 : \Delta\chi^2 \Delta df = 0$$

$$H_1 : \Delta\chi^2 \Delta df > 0$$

Below are the formulas to obtain  $\Delta\chi^2$  and  $\Delta df$  between the first and second-order models.

$$\Delta\chi^2 = \chi^2(\text{second order model}) - \chi^2(\text{first order model}) = 4.96$$

$$\Delta df = df(\text{second order model}) - df(\text{first order model}) = 8$$

Alpha was calculated using an Excel formula, and the P-value is 0.756. The result was not significant at  $p < 0.05$ . This means  $H_1$  was rejected and accepted  $H_0$ . That  $\Delta\chi^2$  there is no significant difference between first and second-order models.

### Discussion

The conclusion of this study integrates the findings from the in-depth qualitative analysis and the quantitative validations to underscore the critical role of DCs and CP within the apparel industry.

The first two objectives of this study are to explore DCs and CP dimensions within the apparel industry. This study identified six empirically validated dimensions, four representing CP and two representing DC, that offer a holistic framework to understand digital transformation and strategic competitiveness in the apparel supply chain. Each dimension reflects a distinct yet interconnected performance or capability domain critical in today's volatile, digitally driven market environment.

Customer Satisfaction emerged as a fundamental dimension of competitive performance, reinforcing its long-established role as both an outcome and driver of supply chain excellence. In the context of the apparel industry, where market responsiveness and short product life cycles are the norm, customer satisfaction reflects the ability to deliver quality, speed, customisation, and service reliability [197]. This dimension aligns with prior research emphasising the role of customer-centric strategies in enhancing brand loyalty and market positioning. It also confirms that digital capabilities contribute to satisfaction by enabling better demand forecasting, product personalisation, and omnichannel fulfilment [198]. Better Utilisation of Resources reflects the operational efficiency aspect of performance, focusing on how effectively an organisation allocates and manages its physical, human, and technological resources. Efficient resource

utilisation is a key competitive lever in the apparel sector, often constrained by cost pressures and labour intensity. This dimension is closely associated with lean manufacturing principles and sustainable operations. The findings support previous research that links digital process integration with reductions in waste, idle time, and cost overruns [199], suggesting that digitalisation enhances speed and precision in resource deployment. This dimension reflects the shift from firm-centric competition to network-based competitiveness, where collaboration across supply chain partners becomes essential. The emergence of Collaboration to Compete aligns with literature on supply chain integration and relational capabilities [200,201]. In an industry where coordination with fabric suppliers, logistics providers, and buyers is vital, collaboration enabled by digital platforms (e.g., shared PLM systems, cloud-based dashboards) is a key performance enabler. This dimension also ties into the ERBV, highlighting the strategic importance of leveraging inter-organisational resources and partnerships [202]. Strategic Advantage captures a firm's ability to leverage digital capabilities to create differentiation and long-term market positioning. Unlike short-term operational gains, this dimension reflects higher-order outcomes such as innovation, resilience, market leadership, and brand equity. It connects with the DCV, emphasising firms' need to sense opportunities, seize them through resource mobilisation, and transform accordingly [36]. In a hyper-competitive apparel market, achieving strategic advantage requires going beyond efficiency to embrace continuous innovation, fast fashion responsiveness, and data-driven strategic decision-making.

Technical Digitalisation refers to the foundational IT infrastructure and technological readiness that support digital transformation. This includes investment in hardware, software, cloud platforms, data analytics tools, and cybersecurity systems. It reflects a firm's capacity to acquire and maintain the technical resources necessary for digital operations. Previous studies suggest that technical IT capability is a necessary but insufficient condition for digital transformation; it lays the groundwork but must be complemented by process and strategic alignment [203,204]. In this study, TD is thus positioned as a base layer that enables higher-level capabilities and outcomes. In contrast, Process digitalisation reflects how digital tools are embedded into day-to-day business and operational processes. This includes using digital technologies in production scheduling, inventory management, quality control, and customer service workflows. PD is a dynamic capability that enables process-level agility, visibility, and automation. It operationalises the transformation of workflows through technology and is essential in bridging the gap between IT investment and actual performance outcomes [205,206]. Importantly, PD supports internal process excellence and external responsiveness, making it critical to achieving both CSA and STA.

Together, these six dimensions provide a multidimensional framework that captures the means (digital capabilities) and ends (competitive performance) of digital transformation in apparel supply chains. Their validation through empirical analysis strengthens their theoretical robustness and practical utility. They respond to scholarly calls for models that move beyond narrow operational metrics to include strategic, relational, and digital elements [207,208]. Moreover, the distinction between TD and PD allows for more nuanced diagnostics and capability development strategies, particularly in resource-constrained environments like Sri Lanka.

The third objective of this study was to develop a robust research instrument that accurately measures the constructs relevant to CP and DCs in apparel manufacturers through a rigorous process involving EFA and CFA. The study successfully identified and validated six key factors that should be included in the final questionnaire. These factors are critical for capturing the underlying dimensions of CP and DCs.

The six validated factors that should be incorporated into the research instrument. CSA, which measures an organisation's effectiveness in meeting customer expectations and delivering value, is a crucial driver of CP. BUR captures how efficiently an organisation manages and optimises its resources, contributing to operational excellence and competitiveness. CTC assesses how organisations collaborate internally and externally to enhance their competitive edge in the marketplace. STA includes an organisation's ability to leverage its strengths to gain and maintain a strategic advantage over competitors. PD focuses on implementing digital technologies to improve organisational processes essential for achieving operational efficiency and innovation. TD measures the extent to which an organisation adopts and integrates technical DCs to enhance its overall performance and competitiveness.

The final questionnaire should include items that comprehensively measure these six factors. Each factor has been shown to have solid loadings and clear contributions to the overarching constructs of CP and DCs. By including these validated factors, the research instrument will provide a reliable and valid tool for assessing the impact of various organisational strategies on performance outcomes.

In the first-order CFA model, the standardised factor loadings were robust, ranging from 0.62 to 0.99, confirming the reliability and validity of the constructs. While the initial model did not fit optimally, iterative adjustments based on modification indices improved the model fit significantly, as evidenced by fit indices such as CMIN/DF (1.183), RMR (0.037), and CFI (0.988). These results indicate that the modified first-order model provided an excellent fit for the data. The second-order CFA model refined the analysis by grouping the first-order latent constructs into higher-order constructs, demonstrating strong relationships between first-order constructs and overarching factors such as CP and DC. The model fit indices, including a CMIN/DF ratio of 0.989 and RMSEA of 0, suggested an exceptional model fit. The model's strong factor loadings and fit indices provide robust support for the theoretical structure and practical application of the model.

When comparing the first-order and second-order models, the chi-square difference test revealed no significant difference between the two models, suggesting that both models fit the data similarly well. This indicates that the simpler first-order model may be sufficient for capturing the relationships between constructs. Still, the second-order model offers additional theoretical depth by consolidating related factors into higher-order constructs. Depending on the research objectives, either model could be applied effectively.

## Theoretical contribution

This chapter articulates how the study offers novel theoretical insights and builds upon existing frameworks to deepen the academic discourse.

**Introduction of a new measurement instrument.** This study makes a substantive theoretical advancement by introducing and empirically validating a multidimensional measurement instrument that captures the complex interplay between DC and CP within the apparel supply chain context. Existing literature on digital transformation in supply chains has been hindered by fragmented constructs, inconsistent operational definitions, and a lack of standardised tools, which collectively undermine theoretical coherence and limit cross-study comparability [203,209]. This research addresses a critical gap by developing a conceptually integrated and empirically robust instrument. It offers a foundation upon which future theoretical work in digital transformation and supply chain competitiveness can be rigorously built.

This study moves beyond sector-specific or technology-centric perspectives that often narrowly define digital capabilities. Instead, it reconceptualises DC through two interrelated dimensions, TD and PD, thereby capturing infrastructural readiness and process-level digital integration. This bifocal approach aligns with the DCV by illustrating how firms acquire digital technologies and embed them into operational routines to sense, seize, and transform in dynamic markets. Furthermore, the instrument identifies four interdependent CP dimensions, CSA, BUR, CTC, and STA, representing a nuanced understanding of competitive performance beyond traditional metrics such as cost or speed. These dimensions provide empirical grounding to theoretical constructs such as supply chain agility, value co-creation, and strategic alignment [197,210]. This contribution is not merely descriptive; it is diagnostic and explanatory. For academics, the instrument offers a validated, theory-driven tool for systematically examining how digitalisation translates into measurable performance outcomes. It facilitates longitudinal analysis and hypothesis-driven research, enabling scholars to explore causal pathways and contingencies in digital transformation efforts. The rigorous application of EFA and CFA enhances construct validity and reliability, making the instrument suitable for replication and comparative analysis across sectors and geographies.

Additionally, this framework advances theoretical dialogue by enabling investigations into digital capabilities' mediating or moderating roles in the resource–performance link, as posited in the RBV and ERBV. It also creates new avenues for cross-national research to explore contextual enablers and constraints of digital transformation, particularly in emerging economies where digital maturity and institutional dynamics differ. This instrument is not merely a measurement tool but

a conceptual innovation that integrates digital capabilities with multifaceted performance outcomes in supply chains. It directly addresses long-standing critiques in the literature regarding the lack of empirical clarity and actionable insights in digital transformation studies [207]. It lays the groundwork for a more mature, empirically grounded theoretical discourse in the digital supply chain domain.

**RBV, DCV, and ERBV alignment.** This study advances theoretical discourse by developing and empirically validating a multidimensional measurement instrument for assessing DC and CP within the apparel supply chain, grounded in the RBV, DCV, and ERBV. These complementary theoretical lenses offer a robust foundation to conceptualize digital capabilities not merely as technical enablers but as strategically embedded, dynamic resources that drive sustainable competitive advantage in volatile, digitized environments.

From the RBV perspective, this study operationalises TD and PD as valuable, rare, inimitable, and non-substitutable resources (VRIN). These digital capabilities directly contribute to firm-level outcomes such as CSA and BUR, reinforcing the argument that digitisation is not merely infrastructural but a strategic asset embedded within organisational routines. The differentiation between TD and PD enables a more nuanced understanding of how heterogeneous digital assets contribute to internal efficiency and external responsiveness, core tenets of sustained performance in the RBV framework. Building on the DCV, the study further demonstrates how digital capabilities enable firms to sense, seize, and transform in response to environmental dynamism. As dimensions of CP, the inclusion of STA and CTC highlights how digital tools empower firms to reconfigure their resource base and align internal and external competencies to capitalise on emerging opportunities. The validated measurement model, therefore, provides empirical grounding for the claim that dynamic capabilities, activated through digitalisation, facilitate agility, innovation, and long-term strategic positioning in the supply chain ecosystem. Moreover, the ERBV is explicitly addressed by incorporating externally embedded digital resources. The study acknowledges that collaborative platforms, cloud-based ecosystems, and digital interfaces with suppliers and customers represent inter-organisational assets. While not owned, these resources are co-created and accessed through digital interconnectivity, playing a pivotal role in enabling CTC and amplifying competitive performance beyond firm boundaries. This aligns with recent calls in the literature to expand RBV-based theorising to account for relational and ecosystem-level digital assets that contribute to sustainable value creation.

This study transcends traditional firm-centric views by bridging RBV, DCV, and ERBV and positions digital transformation as a multi-level, capability-driven phenomenon. The validated measurement instrument provides a theoretically coherent and empirically rigorous foundation for future studies to explore how internal digital capabilities and external partnerships collectively shape competitive trajectories in digitally intensive sectors. In doing so, it offers a significant leap toward integrated theorisation of digital transformation in supply chains grounded in empirical precision and aligned with evolving theoretical paradigms.

## Practical contribution

This study contributes to apparel supply chain practice by introducing a rigorously validated, multidimensional measurement instrument that enables organisations to assess and strategically manage their digital transformation efforts. Far beyond a theoretical construct, this instrument provides a practical, decision-support framework that helps firms translate digital capability assessments into actionable insights for performance improvement.

By using this tool, organisations can systematically evaluate their digital maturity across key dimensions, specifically, PD and TD, and directly link these capabilities to critical competitive performance outcomes such as agility, cost-efficiency, responsiveness, innovation, and customer satisfaction. This enables firms to identify existing capability gaps, diagnose underperforming areas, and prioritise digital investments that yield the greatest strategic return. Importantly, the instrument is flexible and scalable, making it equally relevant for small and medium-sized enterprises (SMEs) and larger firms. SMEs, often limited by financial and human capital, can use the tool to focus on incremental, high-impact digital solutions such as cloud-based analytics, workflow automation, or e-procurement platforms. Meanwhile, larger organisations can leverage



the framework to guide the integration of advanced technologies like AI, IoT, and predictive analytics into complex, multi-tiered supply chain operations.

In practice, this tool supports a wide range of strategic applications:

- Benchmarking digital readiness against industry peers or internal standards.
- Aligning digital initiatives with firm-specific capabilities and strategic objectives.
- Guiding resource allocation toward the most impactful digital interventions.
- Monitoring progress of digital transformation initiatives over time.
- Supporting change management and capability development across functional areas.

The measurement instrument bridges the persistent gap between conceptual understanding and practical execution. It empowers apparel supply chain leaders to move from ad hoc, intuition-based digital adoption toward a structured, evidence-based transformation approach. It enables organisations to navigate technological disruption with greater confidence, resilience, and competitiveness in today's dynamic global apparel landscape.

Although this study was conducted within the Sri Lankan apparel manufacturing context, the validated measurement instrument has strong potential for adaptation and application in other apparel-producing countries, particularly those with similar industry structures and developmental profiles. Emerging economies such as Bangladesh, Vietnam, India, and Ethiopia share comparable challenges, including cost competitiveness, lean margins, export dependency, and increasing pressure to digitise operations. These countries operate within global value chains and are transitioning similarly toward process automation, collaborative platforms, and digital supply chain visibility [211]. While contextual factors such as regulatory frameworks, digital infrastructure, and workforce capabilities may influence the speed and scope of adoption, the instrument provides a structured, diagnostic foundation that can be localised and validated to suit different national settings. This opens pathways for comparative studies and benchmarking initiatives across regions, promoting shared learning and strategic alignment in the global apparel supply chain.

### Limitations and future research directions

Despite its contributions, this study is not without limitations, which should be acknowledged to contextualise the findings and guide future research. First, the research was geographically confined to apparel manufacturers operating in Sri Lanka. While this focus provided in-depth insights into the dynamics of DCs and CP within a key emerging market, the findings may not be fully generalizable to other countries or industries with different institutional, cultural, and technological contexts. The specific characteristics of the Sri Lankan apparel sector, including infrastructure maturity, regulatory environment, and digital readiness, may limit the applicability of the results to broader or more advanced manufacturing contexts. Second, the study employed a cross-sectional survey design and a relatively small sample size, which restricts the ability to infer causal relationships and limits the robustness of generalisations. A longitudinal approach would be better suited to capture the evolution of digital transformation efforts and their sustained impact on competitive performance over time. Third, using an 8-point Likert scale in data collection to reduce neutrality may have introduced response bias, particularly within the Asian cultural context. Research has shown that respondents in collectivist societies often exhibit moderate response tendencies or social desirability bias, potentially skewing self-reported measures [171,212]. This cultural response pattern could affect the precision of constructs like perceived digital capability and performance outcomes, and future studies may consider triangulating with objective data sources to mitigate this limitation.

Future research could address these constraints by expanding the study to include apparel manufacturers in other countries and across different regions, particularly South Asia and Southeast Asia, to assess the external validity of the

proposed framework. Comparative studies could illuminate regional variations in digital capability adoption and performance outcomes, enabling a more comprehensive understanding of context-specific enablers and barriers.

Moreover, future studies should broaden the scope to incorporate key supply chain actors such as suppliers, logistics providers, and retailers to capture the collaborative dimension of digital transformation. Exploring how end-to-end digitisation and partner integration impact CP would offer a more holistic view of value chain competitiveness. Additionally, examining the role of emerging technologies like blockchain, IoT, and artificial intelligence in shaping digital maturity and inter-firm collaboration presents a promising avenue for future inquiry.

A mixed-methods or longitudinal design could enrich future research by combining self-reported perceptions with objective performance indicators such as financial outcomes, production lead times, or on-time delivery metrics. Finally, future studies may investigate moderating factors such as organisational culture, leadership orientation, and environmental uncertainty to deepen understanding of the contextual conditions that enhance or constrain the efficacy of digital transformation strategies.

## Supporting information

**S1 Archive. Supporting information.** Data and results of instrument development.  
(ZIP)

## Author contributions

**Conceptualization:** Emmanuel Susitha.

**Formal analysis:** Emmanuel Susitha.

**Investigation:** Emmanuel Susitha.

**Methodology:** Emmanuel Susitha.

**Supervision:** Amila Jayarathne, H. M. R. P. Herath.

**Validation:** Emmanuel Susitha.

**Visualization:** Emmanuel Susitha.

**Writing – original draft:** Emmanuel Susitha.

**Writing – review & editing:** Amila Jayarathne, H. M. R. P. Herath.

## References

1. Gereffi G, Memedovic O. The global apparel value chain: what prospects for upgrading for developing countries. Vienna, Austria: UNIDO; 2003.
2. Porter ME, Heppelmann JE. How smart, connected products are transforming competition. *Harvard Business Review*. 2014;92(11):64–88.
3. Ma H. Competitive advantage and firm performance. *Competitiveness Review: An International Business Journal*. 2000;10(2):15–32.
4. Ong JW, Ismail HB. Competitive advantage and firm performance: evidence from small and medium enterprises. *International Journal of Business and Globalisation*. 2012;9(2):195–206.
5. Talaja A, Ercegović J. Competitive advantage and company's performance: exploring the differences and relationship. *Advanced Research in Scientific Areas*. 2013;2(6):71–4.
6. Grahovac J, Miller DJ. Competitive advantage and performance: the impact of value creation and costliness of imitation. *Strategic Management Journal*. 2009;30(11):1192–212.
7. Teng G a r y S, Jaramillo H. A model for evaluation and selection of suppliers in global textile and apparel supply chains. *International Journal of Physical Distribution & Logistics Management*. 2005;35(7):503–23.
8. Wang F, Zhuo X, Niu B. Sustainability analysis and buy-back coordination in a fashion supply chain with price competition and demand uncertainty. *Sustainability*. 2016;9(1):25. <https://doi.org/10.3390/su9010025>
9. Bruce M, Daly L. Adding value: challenges for UK apparel supply chain management—a review. *Production Planning & Control*. 2011;22(3):210–20.

10. Bruce M, Daly L. Innovative process in E-commerce fashion supply chains. In: Cheng T, Choi TM, editors. *Innovative quick response programs in logistics and supply chain management*. Berlin, Heidelberg: Springer; 2010. p. 227–42.
11. Dickerson KG. *Textiles and apparel in the global economy*. 3rd ed. New Jersey: Prentice Hall; 1999.
12. Yang Y, Zhong C. China's textile and clothing exports in a changing world economy. *The Developing Economies*. 1998;36(1):19–22.
13. Gereff G, Federic S. The global apparel value chain, trade and the crisis: challenges and opportunities for developing countries. In: Cattaneo O, Gereff G, Staritz C, editors. *Global Value Chains in a Post-crisis World*. Washington, DC: World Bank; 2010. p. 157–208.
14. Alam MS, Selvanathan EA, Selvanathan S, Hossain M. The apparel industry in the post-Multifiber Arrangement environment: A review. *Review Development Economics*. 2018;23(1):454–74. <https://doi.org/10.1111/rode.12556>
15. Cachon GP, Swinney R. The value of fast fashion: Quick response, enhanced design, and strategic consumer behavior. *Management Science*. 2011;57(4):778–95.
16. Khin S, Ho TC. Digital technology, digital capability and organizational performance: A mediating role of digital innovation. *International Journal of Innovation Science*. 2019;11(2):177–95. <https://doi.org/10.1108/ijis-08-2018-0083>
17. Kampakaki E, Papahristou E, editors. *Digital Intelligence as Prerequisite of Artificial Intelligence's Integration in the Clothing Industry 4.0*. SETN2020, 11th Hellenic Conference in Artificial Intelligence; 2020; Demokritos, Athens Greece.
18. Kyengo JM, Kilika J. Strategic assets, competitive capabilities and firm performance: review of the literature. *Journal of Business and Economic Development*. 2017;2(3):140–7.
19. Luo J, Fan M, Zhang H. Information technology and organizational capabilities: A longitudinal study of the apparel industry. *Decision Support Systems*. 2012;53(1):186–94.
20. Moore M, Fairhurst A. Marketing capabilities and firm performance in fashion retailing. *Journal of Fashion Marketing and Management: An International Journal*. 2003;7(4):386–97. <https://doi.org/10.1108/13612020310496976>
21. Luo J, Fan M, Zhang H. Information technology, cross-channel capabilities, and managerial actions: evidence from the apparel industry. *Journal of the Association for Information Systems*. 2016;17(5):308–27.
22. Hoque MA, Rasiyah R, Furuoka F, Kumar S. Critical determinants and firm performance of sustainable technology adoption in the apparel industry: the stakeholder approach. *Journal of Fashion Marketing and Management: An International Journal*. 2022;27(1):182–200. <https://doi.org/10.1108/jfmm-06-2021-0147>
23. Hindarto D. Building the future of the apparel industry: The digital revolution in enterprise architecture. *Sinkron: jurnal dan penelitian teknik informatika*. 2024;8(1):542–55.
24. Shahadat MH, Chowdhury AHMY, Nathan RJ, Fekete-Farkas M. Digital technologies for firms' competitive advantage and improved supply chain performance. *Journal of Risk and Financial Management*. 2023;16(2):94.
25. Amouei A, Valmohammadi C, Fathi K. Developing and validating an instrument to measure the impact of digital supply chain activities on sustainable performance. *Journal of Enterprise Information Management*. 2023;36(4):925–51.
26. Groberg M, Vetter H-M, Flatten TC, editors. *A measurement instrument for digitization: Scale development and impact on new product performance*. Academy of Management Proceedings. New York: Academy of Management Briarcliff Manor; 2016.
27. Kahrović E, Avdović A. Impact of digital technologies on business performance in Serbia. *Management: Journal of Sustainable Business and Management Solutions in Emerging Economies*. 2023;28(2):37–54.
28. Martincevic I. The Correlation Between Digital technology and Digital Competitiveness. *International Journal for Quality Research*. 2022;16(2):541–58.
29. Neirotti P, Ricci A, Tubiana M. Foreign markets and the nature of digital technologies: mixed-methods evidence from Italian firms 2024 14th September 2024. Available from: [https://papers.ssrn.com/sol3/papers.cfm?abstract\\_id=4749201](https://papers.ssrn.com/sol3/papers.cfm?abstract_id=4749201)
30. Magomedov RM. Digital Technologies for Competitive Analysis and Evaluation of Competitive Capacity of a Business Entity. *International Journal of Innovative Technology and Exploring Engineering*. 2019;9(1):1184–9. <https://doi.org/10.35940/ijitee.a4522.119119>
31. Hoque MA, Rasiyah R, Furuoka F, Kumar S. Technology adoption in the apparel industry: insight from literature review and research directions. *Research Journal of Textile and Apparel*. 2021.
32. Papahristou E, Bilalis N. Should the fashion industry confront the sustainability challenge with 3D prototyping technology. *International Journal of Sustainable Engineering*. 2017;10(4–5):207–14. <https://doi.org/10.1080/19397038.2017.1348563>
33. Barney JB. Firm resources and sustained competitive advantage. In: Baum JAC, Dobbin F, editors. *Economics meets sociology in strategic management*, vol. 17. Leeds: Emerald Group Publishing Limited; 2000. p. 203–27.
34. Wade M, Hulland J. The resource-based view and information systems research: Review, extension, and suggestions for future research. *MIS Quarterly*. 2004;28(1):107–42.
35. Zhang Y, Gu M, Huo B. Antecedents and consequences of supply chain agility: a competence-capability-performance paradigm. *Journal of Business & Industrial Marketing*. 2022;38(5):1087–100. <https://doi.org/10.1108/jbim-05-2021-0262>
36. Teece DJ. Explicating dynamic capabilities: the nature and microfoundations of (sustainable) enterprise performance. *Strategic Management Journal*. 2007;28(13):1319–50. <https://doi.org/10.1002/smj.640>

37. Teece DJ. Dynamic capabilities. In: Kessler EH, editor. *Encyclopedia of Management Theory*. SAGE; 2013.
38. Teece DJ. A dynamic capabilities-based entrepreneurial theory of the multinational enterprise. *J Int Bus Stud*. 2014;45(1):8–37. <https://doi.org/10.1057/jibs.2013.54>
39. Teece DJ, Pisano G, Shuen A. Dynamic capabilities and strategic management. *Strat Mgmt J*. 1997;18(7):509–33. [https://doi.org/10.1002/\(sici\)1097-0266\(199708\)18:7<509::aid-smj882>3.0.co;2-z](https://doi.org/10.1002/(sici)1097-0266(199708)18:7<509::aid-smj882>3.0.co;2-z)
40. Eisenhardt KM, Martin JA. Dynamic capabilities: what are they? *Strategic Management Journal*. 2000;21(10–11):1105–21.
41. Hart SL. A Natural-Resource-Based View of the Firm. *The Academy of Management Review*. 1995;20(4):986. <https://doi.org/10.2307/258963>
42. Hart SL, Dowell G. Invited editorial: A natural-resource-based view of the firm: Fifteen years after. *Journal of Management*. 2011;37(5):1464–79.
43. Bag S, Pretorius JHC, Gupta S, Dwivedi YK. Role of institutional pressures and resources in the adoption of big data analytics powered artificial intelligence, sustainable manufacturing practices and circular economy capabilities. *Technological Forecasting and Social Change*. 2021;163:120420. <https://doi.org/10.1016/j.techfore.2020.120420>
44. Mandal S. The influence of big data analytics management capabilities on supply chain preparedness, alertness and agility: An empirical investigation. *Information Technology & People*. 2019;32(2):297–318. <https://doi.org/10.1108/itp-11-2017-0386>
45. Hausman WH. Supply Chain Performance Metrics. In: Harrison TP, Lee HL, Neale JJ, Hausman WH, editors. *The Practice of Supply Chain Management: Where Theory and Application Converge*, vol. 62. Boston, MA: Springer; 2004. p. 61–73.
46. Irfan M, Wang M, Akhtar N. Impact of IT capabilities on supply chain capabilities and organizational agility: a dynamic capability view. *Oper Manag Res*. 2019;12(3–4):113–28. <https://doi.org/10.1007/s12063-019-00142-y>
47. R. R. Flexible business strategies to enhance resilience in manufacturing supply chains: An empirical study. *Journal of Manufacturing Systems*. 2021;60:903–19. <https://doi.org/10.1016/j.jmsy.2020.10.010>
48. Lii P, Kuo FI. Innovation-oriented supply chain integration for combined competitiveness and firm performance. *International Journal of Production Economics*. 2016;174:142–55.
49. Ataseven C, Nair A. Assessment of supply chain integration and performance relationships: A meta-analytic investigation of the literature. *International Journal of Production Economics*. 2017;185:252–65. <https://doi.org/10.1016/j.ijpe.2017.01.007>
50. Khai LL, Mohamed Udin Z, Hassan MG. A review of relational capabilities on supply chain performance in textile and apparel industry. *The 4th International Conference on Technology and Operations Management*; Malaysia: Universiti Utara Malaysia; 2014. p. 169–78.
51. Ahmad S, Khalil AAB, Rashed C. Impact of efficiency in apparel supply chain. *Asian Journal of Natural and Applied Sciences*. 2012;1(4):36–45.
52. Bolton RN, Lemon KN. A Dynamic Model of Customers' Usage of Services: Usage as an Antecedent and Consequence of Satisfaction. *Journal of Marketing Research*. 1999;36(2):171. <https://doi.org/10.2307/3152091>
53. Cao Y, Gruca TS, Klemz BR. Internet pricing, price satisfaction, and customer satisfaction. *International Journal of Electronic Commerce*. 2003;8(2):31–50.
54. Abeysekara N, Wang H, Kuruppuarachchi D. Effect of supply-chain resilience on firm performance and competitive advantage: A study of the Sri Lankan apparel industry. *Business Process Management Journal*. 2019;25(7):1673–95. <https://doi.org/10.1108/bpmj-09-2018-0241>
55. Panigrahi RR, Jena D, Meher JR, Shrivastava AK. Assessing the impact of supply chain agility on operational performances—a PLS-SEM approach. *Measuring Business Excellence*. 2022;27(1):1–24. <https://doi.org/10.1108/mbe-06-2021-0073>
56. Gunasekaran A, Lai K h, Cheng TE. Responsive supply chain: a competitive strategy in a networked economy. *Omega*. 2008;36(4):549–64.
57. Nawanir G, Kong Teong L, Norezam Othman S. Impact of lean practices on operations performance and business performance: some evidence from Indonesian manufacturing companies. *Journal of Manufacturing Technology Management*. 2013;24(7):1019–50. <https://doi.org/10.1108/jmtm-03-2012-0027>
58. Yang Y, Jia F, Xu Z. Towards an integrated conceptual model of supply chain learning: an extended resource-based view. *Supply Chain Management: An International Journal*. 2019;24(2):189–214.
59. Slack N, Chambers S, Johnston R. *Operations management*. 6th ed. Pearson College Div; 2010.
60. Seiders K, Berry LL, Gresham LG. Attention, retailers! How convenient is your convenience strategy? *MIT Sloan Management Review*. 2000;41(3):79.
61. Szymanski DM, Hise RT. E-satisfaction: an initial examination. *Journal of Retailing*. 2000;76(3):309–22. [https://doi.org/10.1016/S0022-4359\(00\)00035-X](https://doi.org/10.1016/S0022-4359(00)00035-X)
62. Hallencreutz J, Parmler J. Important drivers for customer satisfaction – from product focus to image and service quality. *Total Quality Management & Business Excellence*. 2019;32(5–6):501–10. <https://doi.org/10.1080/14783363.2019.1594756>
63. Callen JL, Morel M, Fader C. Productivity measurement and the relationship between plant performance and JIT intensity. *Contemporary Accounting Research*. 2005;22(2):271–309.
64. Belekoukias I, Garza-Reyes JA, Kumar V. The impact of lean methods and tools on the operational performance of manufacturing organisations. *International Journal of Production Research*. 2014;52(18):5346–66. <https://doi.org/10.1080/00207543.2014.903348>
65. Wu Y, Wu Y, Harrison. *Achieving supply chain agility*. 1st ed. Switzerland: Springer; 2019.
66. Van Hoek RI, Harrison A, Christopher M. Measuring agile capabilities in the supply chain. *International Journal of Operations & Production Management*. 2001.

67. Lo V, Sculli D, Yeung A, editors. Exploring how to develop customer-oriented business strategies in a clothing supply chain: a study in Southern China. 2004 IEEE International Engineering Management Conference (IEEE Cat No 04CH37574). IEEE; 2004.
68. Sarma G, Chakraborty S. A research on customer service quality and customer satisfaction of organized apparel sector: A case of Pantaloon, Kolkata. *International Journal for Research in Applied Science and Engineering Technology*. 2022;10(4):629–44.
69. Gilaninia S, Taleghani M, Mousavian SJ, Jalilvand S, Khanjani S, Rad MS, et al. Impact of supply chain dimensions on customer satisfaction. *Kuwait Chapter of Arabian Journal of Business and Management Review*. 2012;1(5):1–8.
70. Islam MA, Khadem M, Sayem A. Service quality, customer satisfaction and customer loyalty analysis in Bangladesh apparel fashion retail: an empirical study. *International Journal of Fashion Design, Technology and Education*. 2012;5(3):213–24. <https://doi.org/10.1080/17543266.2012.723754>
71. Naqvi MH, Asim DM, Manzur S. Analysing the impact of supply chain agility on customer satisfaction through responsiveness and innovation. *CenRaPS Journal of Social Sciences*. 2020;2(1):26–40.
72. Kleindorfer PR, Singhal K, VanWassenhove LN. Sustainable Operations Management. *Production and Operations Management*. 2005;14(4):482–92. <https://doi.org/10.1111/j.1937-5956.2005.tb00235.x>
73. Simatupang TM, Sridharan R. The Collaborative Supply Chain. *The International Journal of Logistics Management*. 2002;13(1):15–30. <https://doi.org/10.1108/09574090210806333>
74. Johnson ME. Product design collaboration: capturing lost supply chain value in the apparel industry. Hanover, NH: Tuck School of Business Dartmouth College; 2002.
75. Huang Y, Han W, Macbeth DK. The complexity of collaboration in supply chain networks. *Supply Chain Management: An International Journal*. 2020;25(3):393–410. <https://doi.org/10.1108/scm-11-2018-0382>
76. Ramesh A. Study of select collaboration issues in supply chain management of apparel retail industry. *Journal of Modelling in Management*. 2010;5(2):176–93.
77. Porter ME. *Competitive Strategy: Techniques for Analyzing Industries and Competitors*. New York, USA: The Free Press; 1980.
78. Christopher M. The agile supply chain: competing in volatile markets. *Industrial Marketing Management*. 2000;29(1):37–44.
79. Shukla SK, Sushil. Generic flexibility evaluation model. In: Suri P, Yadav R, editors. *Transforming organizations through flexible systems management*. Singapore: Springer; 2019. p. 3–18.
80. Monsur SMT, Yoshi T. Improvement of firm performance by achieving competitive advantages through vertical integration in the apparel industry of Bangladesh. *Asian Economic and Financial Review*. 2012;2(6):687–712.
81. Khan S, Wahab A. Engaging customers through satisfaction; does social media marketing and perceived innovativeness really matter? A time-lagged study in the hospitality industry. *Journal of Hospitality and Tourism Insights*. 2024;7(4):2347–66.
82. Uduwela WC, De Silva R, Rupasinghe T, editors. Digital transformations in the apparel value chain for mass personalization. 2020 IEEE International Conference on Industrial Engineering and Engineering Management (IEEM). IEEE; 2020.
83. Campbell J, Parsons J. Taking advantage of the design potential of digital printing technology for apparel. *Journal of Textile and Apparel, Technology and Management*. 2005;4(3):1–10.
84. Bhatia M, Kale S. State of Digitalization in Lifestyle Apparel Industry. *Journal of Law and Sustainable Development*. 2023;11(6):e1255-e.
85. Rauschnabel PA, Felix R, Hinsch C. Augmented reality marketing: How mobile AR-apps can improve brands through inspiration. *Journal of Retailing and Consumer Services*. 2019;49:43–53. <https://doi.org/10.1016/j.jretconser.2019.03.004>
86. Nhelekwa LB, Mollel JZ, Taifa IWR. Assessing the digitalisation level of the Tanzanian apparel industry: Industry 4.0 perspectives. *Research Journal of Textile and Apparel*. 2022;28(2):185–205. <https://doi.org/10.1108/rjta-11-2021-0138>
87. Nafz R, Schinle C, Kaiser C, Kyosev YK. Digital transformation of the textile process chain—state-of-the-art. *Communications in Development and Assembling of Textile Products*. 2022;3(2):79–89.
88. Bertola P, Teunissen J. Fashion 4.0. Innovating fashion industry through digital transformation. *Research Journal of Textile and Apparel*. 2018.
89. Schniederjans DG, Curado C, Khalajhedayati M. Supply chain digitisation trends: An integration of knowledge management. *International Journal of Production Economics*. 2020;220:107439. <https://doi.org/10.1016/j.ijpe.2019.07.012>
90. Sanjay B. Fashion in Metaverse India: Fiber2Fashion. 2022. Available from: <https://www.fibre2fashion.com/industry-article/9352/fashion-in-metaverse>
91. AlRabiah S, Marder B, Marshall D, Angell R. Too much information: An examination of the effects of social self-disclosure embedded within influencer eWOM campaigns. *Journal of Business Research*. 2022;152:93–105. <https://doi.org/10.1016/j.jbusres.2022.07.029>
92. Weill P, Subramani M, Broadbent M. IT infrastructure for strategic agility. 2002.
93. Bhatt GD, Grover V. Types of information technology capabilities and their role in competitive advantage: An empirical study. *Journal of Management Information Systems*. 2005;22(2):253–77.
94. Mao H, Liu S, Zhang J, Deng Z. Information technology resource, knowledge management capability, and competitive advantage: The moderating role of resource commitment. *International Journal of Information Management*. 2016;36(6):1062–74. <https://doi.org/10.1016/j.ijinfomgt.2016.07.001>
95. Hunter SD. Information technology, organizational learning, and the market value of the firm. *The Journal of Information Technology Theory and Application*. 2003;5(1):1–28.



96. Dehning B, Stratopoulos T. Determinants of a sustainable competitive advantage due to an IT-enabled strategy. *The Journal of Strategic Information Systems*. 2003;12(1):7–28. [https://doi.org/10.1016/s0963-8687\(02\)00035-5](https://doi.org/10.1016/s0963-8687(02)00035-5)
97. Lai F, Zhang M, Lee DM, Zhao X. The impact of supply chain integration on mass customization capability: an extended resource-based view. *IEEE Transactions on Engineering Management*. 2012;59(3):443–56.
98. Okumus F. Facilitating knowledge management through information technology in hospitality organizations. *Journal of Hospitality and Tourism Technology*. 2013.
99. Cakmak PI, Tas E. The use of information technology on gaining competitive advantage in Turkish contractor firms. *World Applied Sciences Journal*. 2012;18(2):274–85.
100. Saeidi P, Saeidi SP, Sofian S, Saeidi SP, Nilashi M, Mardani A. The impact of enterprise risk management on competitive advantage by moderating role of information technology. *Computer Standards & Interfaces*. 2019;63:67–82. <https://doi.org/10.1016/j.csi.2018.11.009>
101. Swafford PM, Ghosh S, Murthy N. Achieving supply chain agility through IT integration and flexibility. *International Journal of Production Economics*. 2008;116(2):288–97.
102. Chen H, Nunes JMB, Ragsdell G, An X. Somatic and cultural knowledge: drivers of a habitus-driven model of tacit knowledge acquisition. *Journal of Documentation*. 2019;75(5):927–53. <https://doi.org/10.1108/jd-03-2018-0044>
103. Garcia-Alcaraz JL, Maldonado-Macias AA, Alor-Hernandez G, Sanchez-Ramirez C. The impact of information and communication technologies (ICT) on agility, operating, and economical performance of supply chain. *Adv Produc Engineer Manag*. 2017;12(1):29–40. <https://doi.org/10.14743/apem2017.1.237>
104. Dinoka PG, Khatibi A, Nimal N, Chinna K. Gap analysis of employee-organization congruence factors: Perspective of factory employees in Sri Lankan apparel sector. *International Journal of Academic Research in Management*. 2013;2(3).
105. Narawita U, Layangani LS, editors. How the performance measurement of supply chain contributes in achieving organisational objectives of Sri Lankan apparel organisations. 2015 Moratuwa Engineering Research Conference (MERCon). Sri Lanka: IEEE; 2015.
106. Perera PST, Perera HSC. Developing a Performance Measurement System for Apparel Sector Lean Manufacturing Organizations in Sri Lanka. *Vision: The Journal of Business Perspective*. 2013;17(4):293–301. <https://doi.org/10.1177/0972262913505371>
107. Abeykoon MWB, De Alwis C. The Impact of Total Quality Management Practices on Export Performance of Apparel Exporters in Sri Lanka. *Kelaniya J Hum Res Mgt*. 2015;10(1–2):104. <https://doi.org/10.4038/kjhrm.v10i1-2.23>
108. Sivalogathan V. Innovation capability for better performance: intellectual capital and organization performance of the apparel industry in Sri Lanka. 2013;1(3):273–7.
109. Durairatnam S, Chong SC, Jusoh M. Measuring determinants of quality performance: Pilot study in Sri Lankan apparel industry. *International Journal of Scientific and Technology Research*. 2020;9(1):1291–302.
110. Denscombe M. Communities of Practice: A research paradigm for the mixed methods approach. *Journal of Mixed Methods Research*. 2008;2(3):270–83. <https://doi.org/10.1177/1558689808316807>
111. Mitchell A, Education AE. A review of mixed methods, pragmatism and abduction techniques. *The Electronic Journal of Business Research Methods*. 2018;16:103–16.
112. Creswell JW. *Research design: Qualitative, quantitative, and mixed methods approaches*. 4th ed. Thousand Oaks, CA: Sage Publications; 2014.
113. Hall R. Mixed methods: In search of a paradigm. In: *Conducting research in a changing and challenging world*. 2013. p. 71–8.
114. Tashakkori A, Creswell J. Editorial: The New Era of Mixed Methods Research. *Journal of Mixed Methods Research*. 2007;1(1):3–7.
115. Schoonenboom J, Johnson RB. How to construct a mixed methods research design. *Kolner Zeitschrift fur Soziologie und Sozialpsychologie*. 2017;69(Suppl 2):107.
116. Brinkmann S. *Qualitative interviewing: Conversational knowledge through research interviews*. Oxford University Press; 2022.
117. Palinkas LA, Horwitz SM, Green CA, Wisdom JP, Duan N, Hoagwood K. Purposeful Sampling for Qualitative Data Collection and Analysis in Mixed Method Implementation Research. *Adm Policy Ment Health*. 2015;42(5):533–44. <https://doi.org/10.1007/s10488-013-0528-y> PMID: 24193818
118. Bansal P, Smith WK, Vaara E. New Ways of Seeing through Qualitative Research. *Academy of Management Journal*. 2018;61(4):1189–95. <https://doi.org/10.5465/amj.2018.4004>
119. Gioia DA, Corley KG, Hamilton AL. Seeking Qualitative Rigor in Inductive Research: Notes on the Gioia methodology. *Organizational Research Methods*. 2013;16(1):15–31. <https://doi.org/10.1177/1094428112452151>
120. Crick JM. Qualitative research in marketing: what can academics do better? *Journal of Strategic Marketing*. 2021;29(5):390–429. <https://doi.org/10.1080/0965254x.2020.1743738>
121. Singh N, Benmamoun M, Meyr E, Arkan RH. Verifying rigor: analyzing qualitative research in international marketing. *International Marketing Review*. 2021;38(6):1289–307. <https://doi.org/10.1108/imr-03-2020-0040>
122. Marzi G, Balzano M, Marchiori D. K-Alpha Calculator-Krippendorff's Alpha Calculator: A user-friendly tool for computing Krippendorff's Alpha inter-rater reliability coefficient. *MethodsX*. 2024;12:102545. <https://doi.org/10.1016/j.mex.2023.102545> PMID: 39669968
123. QSR International. NVivo 7: QSR International Pvt Ltd. 2006. Available from: <https://download.qsrinternational.com/Document/NVivo7/NVivo%207%20Overview.pdf>

124. Stock JR, Boyer SL. Developing a consensus definition of supply chain management: a qualitative study. *International Journal of Physical Distribution & Logistics Management*. 2009;39(8):690–711. <https://doi.org/10.1108/09600030910996323>
125. Bell E, Bryman A, Harley B. *Business research methods*. 2nd ed. Oxford, New York: Oxford University Press; 2022.
126. Bougie R, Sekaran U. *Research methods for business: A skill building approach*. John Wiley & Sons; 2019.
127. Dattalo P. *Determining sample size: balancing power, precision, and practicality*. Oxford University Press; 2008.
128. Hair JF, Hult GTM, Ringle CM, Sarstedt MA. *A primer on partial least squares Structural Equation Modeling (PLS-SEM)*. Los Angeles: SAGE; 2016.
129. Hair JF, Risher JJ, Sarstedt M, Ringle CM. When to use and how to report the results of PLS-SEM. *European Business Review*. 2019.
130. Kline RB. *Principles and practice of structural equation modeling*. 4th ed. New York, USA: Guilford Publications; 2016.
131. Ringle CM, Sarstedt M, Mitchell R, Gudergan SP. Partial least squares structural equation modeling in HRM research. *The International Journal of Human Resource Management*. 2018;31(12):1617–43. <https://doi.org/10.1080/09585192.2017.1416655>
132. Uttley J. Power analysis, sample size, and assessment of statistical assumptions—improving the evidential value of lighting research. *Leukos*. 2019;15(2–3):143–62.
133. Memon MA, Ting H, Cheah J-H, Thurasamy R, Chuah F, Cham TH. Sample Size for Survey Research: Review and Recommendations. *Journal of Applied Structural Equation Modeling*. 2020;4(2):1–20. [https://doi.org/10.47263/jasem.4\(2\)01](https://doi.org/10.47263/jasem.4(2)01)
134. Sarstedt M, Ringle CM, Hair JF. Partial least squares structural equation modeling. In: *Handbook of market research*. Springer; 2021. p. 587–632.
135. Suresh K. An overview of randomization techniques: An unbiased assessment of outcome in clinical research. *J Hum Reprod Sci*. 2011;4(1):8–11. <https://doi.org/10.4103/0974-1208.82352> PMID: [21772732](https://pubmed.ncbi.nlm.nih.gov/21772732/)
136. Singer E, Ye C. The use and effects of incentives in surveys. *The ANNALS of the American Academy of Political and Social Science*. 2013;645(1):112–41.
137. Nishimura A, Carey J, Erwin PJ, Tilburt JC, Murad MH, McCormick JB. Improving understanding in the research informed consent process: a systematic review of 54 interventions tested in randomized control trials. *BMC Med Ethics*. 2013;14:28. <https://doi.org/10.1186/1472-6939-14-28> PMID: [23879694](https://pubmed.ncbi.nlm.nih.gov/23879694/)
138. Sahoo S, Padhy SK, Ipsita J, Mehra A, Grover S. Demystifying the myths about COVID-19 infection and its societal importance. *Asian J Psychiatr*. 2020;54:102244. <https://doi.org/10.1016/j.aip.2020.102244> PMID: [32593121](https://pubmed.ncbi.nlm.nih.gov/32593121/)
139. van Heerden AC, Norris SA, Tollman SM, Richter LM. Collecting Health Research Data: comparing mobile phone-assisted personal interviewing to paper-and-pen data collection. *Field Methods*. 2014;26(4):307–21. <https://doi.org/10.1177/1525822x13518184>
140. Lefever S, Dal M, Matthíasdóttir Á. Online data collection in academic research: advantages and limitations. *Brit J Educational Tech*. 2006;38(4):574–82. <https://doi.org/10.1111/j.1467-8535.2006.00638.x>
141. Galesic M, Bosnjak M. Effects of Questionnaire Length on Participation and Indicators of Response Quality in a Web Survey. *Public Opinion Quarterly*. 2009;73(2):349–60. <https://doi.org/10.1093/poq/nfp031>
142. Nunes J, Martins JT, Zhou L, Alajamy M, Al-Mamari S. Contextual sensitivity in grounded theory: The role of pilot studies. *The Electronic Journal of Business Research Methods*. 2010;8(2):73–84.
143. Martinez F. Process excellence the key for digitalisation. *Business Process Management Journal*. 2019;25(7):1716–33.
144. Vorlet O, Neutsch L, Kronseder C, Kuhn A. Digitalization in Processes: FH-HES Universities of Applied Sciences. *Chimia*. 2021;75(7–8):681.
145. Kirchmer M, Franz P, Gusain R, editors. *Digitalization of the Process of Process Management*. Proc Seventh International Symposium on Business Modeling and Software Design. 2017.
146. Hofmann M, Hofmann M. Influence of digitalisation on process optimisation. In: *A holistic approach to process optimisation: Tools and practical examples to create efficient workflows*. 2021. p. 121–34.
147. Stoffels M, Ziemer C. Digitalization in the process industries-evidence from the German water industry. *Journal of Business Chemistry*. 2017;14(3).
148. Arikan CO. Developing an intelligent automation and reporting system for fabric inspection machines. *Textile and Apparel*. 2019;29(1):93–100.
149. Malek AS, Drean J-Y, Bigue L, Osselin J-F. Optimization of automated online fabric inspection by fast Fourier transform (FFT) and cross-correlation. *Textile Research Journal*. 2012;83(3):256–68. <https://doi.org/10.1177/0040517512458340>
150. Cho C-S, Chung B-M, Park M-J. Development of Real-Time Vision-Based Fabric Inspection System. *IEEE Trans Ind Electron*. 2005;52(4):1073–9. <https://doi.org/10.1109/tie.2005.851648>
151. Shanbhag PM, Deshmukh MP, Suralkar SR. Overview: methods of automatic fabric defect detection. *Global Journal of Engineering, Design & Technology*. 2012;1(2):42–6.
152. Kamal M. Developing a conceptual model for restructuring apparel sampling development process using virtual reality technology. *International Design Journal*. 2015;5(2):415–23.
153. Papahristou E. Can 3D Virtual Prototype Conquer the Apparel Industry? *J Fashion Technol Textile Eng*. 2016;4(2):1–6. <https://doi.org/10.4172/2329-9568.1000134>
154. Istook CL, Newcomb EA, Lim H. Three-dimensional (3D) technologies for apparel and textile design. In: Hu J, editor. *Computer Technology for Textiles and Apparel*. Woodhead Publishing; 2011. p. 296–325.

155. Okabe H, Imaoka H, Tomiha T, Niwaya H. Three dimensional apparel CAD system. *Computer graphics and interactive techniques*. 1992;26(2):105–10.
156. Sanchez H, Whang C, editors. *An Exploratory Study on Drivers of 3D Simulated Software Adoption in the Apparel Industry*. International Textile and Apparel Association Annual Conference Proceedings. Iowa: Iowa State University Digital Press; 2022.
157. Papahristou E, Bilalis N. 3D virtual prototyping traces new avenues for fashion design and product development: A qualitative study. *Journal of Textile Science & Engineering*. 2017;7(2):1–6.
158. Oulton D, editor. *Technology for colour management*. Proceedings of the 1st International Conference on Digital Technologies for the Textile Industries. Manchester, UK: The University of Manchester; 2013.
159. Tyler DJ. 12 - Digital printing technology for textiles and apparel. In: Hu J, editor. *Computer Technology for Textiles and Apparel*. Woodhead Publishing; 2011. p. 259–82.
160. Javoršek D, Javoršek A. Colour management in digital textile printing. *Coloration Technology*. 2011;127(4):235–9. <https://doi.org/10.1111/j.1478-4408.2011.00304.x>
161. Ujiie H. *Digital printing of textiles*. 1st ed. UK: Woodhead Publishing Limited; 2006.
162. Davis AE. Instrument development: getting started. *J Neurosci Nurs*. 1996;28(3):204–7. <https://doi.org/10.1097/01376517-199606000-00009> PMID: 8818987
163. Polit DF, Beck CT, Owen SV. Is the CVI an acceptable indicator of content validity? Appraisal and recommendations. *Res Nurs Health*. 2007;30(4):459–67. <https://doi.org/10.1002/nur.20199> PMID: 17654487
164. Tilden VP, Nelson CA, May BA. Use of qualitative methods to enhance content validity. *Nurs Res*. 1990;39(3):172–5. <https://doi.org/10.1097/00006199-199005000-00015> PMID: 2342905
165. Gilbert GE, Prion S. Making Sense of Methods and Measurement: Lawshe's Content Validity Index. *Clinical Simulation in Nursing*. 2016;12(12):530–1. <https://doi.org/10.1016/j.ecns.2016.08.002>
166. Davis LL. Instrument review: Getting the most from a panel of experts. *Applied Nursing Research*. 1992;5(4):194–7.
167. Perreault Jr WD, Leigh LE. Reliability of nominal data based on qualitative judgments. *Journal of Marketing Research*. 1989;26(2):135–48.
168. Byrne BM. Testing for multigroup equivalence of a measuring instrument: a walk through the process. *Psicothema*. 2008;20(4):872–82. PMID: 18940097
169. Taherdoost H. What is the best response scale for survey and questionnaire design; review of different lengths of rating scale/attitude scale/Likert scale. *Hamed Taherdoost*. 2019:1–10.
170. He J, Van de Vijver FJR, Fetvadjev VH, de Carmen Dominguez Espinosa A, Adams B, Alonso-Arbiol I, et al. On Enhancing the Cross-Cultural Comparability of Likert-Scale Personality and Value Measures: A Comparison of Common Procedures. *Eur J Pers*. 2017;31(6):642–57. <https://doi.org/10.1002/per.2132>
171. Harzing A-W. Response Styles in Cross-national Survey Research: A 26-country study. *Int J Cross Cultural Management*. 2006;6(2):243–66. <https://doi.org/10.1177/1470595806066332>
172. Smith PB, Fischer R. Acquiescence, extreme response bias and culture: A multilevel analysis. In: *Multilevel analysis of individuals and cultures*. Psychology Press; 2015. p. 285–314.
173. Fong CC. *A pseudo longitudinal study of using intranet for supporting management accounting: evidence from Hong Kong Public Hospitals*. Curtin University of Technology; 2005.
174. Tabachnick BG, Fidell LS. *Using multivariate statistics*. 7th ed. Boston, MA, USA: Pearson Education; 2007.
175. Tabachnick BG, Fidell LS. *Using multivariate statistics*. 6th ed. Pearson; 2013.
176. Field A. *Discovering statistics using IBM SPSS statistics*. 4th ed. London: Sage publications limited; 2013.
177. Williams B, Onsmann A, Brown T. Exploratory Factor Analysis: A Five-Step Guide for Novices. *Australasian Journal of Paramedicine*. 2010;8:1–13. <https://doi.org/10.33151/ajp.8.3.93>
178. Shrestha N. Factor Analysis as a Tool for Survey Analysis. *American Journal of Applied Mathematics and Statistics*. 2021;9(1):4–11. <https://doi.org/10.12691/ajams-9-1-2>
179. Costello AB, Osborne J. Best practices in exploratory factor analysis: Four recommendations for getting the most from your analysis. *Practical Assessment, Research, and Evaluation*. 2019;10(1):7.
180. Worthington RL, Whittaker TA. Scale development research: A content analysis and recommendations for best practices. *The Counseling Psychologist*. 2006;34(6):806–38. <https://doi.org/10.1177/0011000006288127>
181. Corner S. Choosing the right type of rotation in PCA and EFA. *JALT Testing & Evaluation SIG Newsletter*. 2009;13(3):20–5.
182. Hayton JC, Allen DG, Scarpello V. Factor retention decisions in exploratory factor analysis: A tutorial on parallel analysis. *Organizational Research Methods*. 2004;7(2):191–205.
183. Patil V, Surendra S, Sanjay M, Todd D. Parallel Analysis Engine to Aid in Determining Number of Factors to Retain using R [Computer software]. 2017. Available from: <https://analytics.gonzaga.edu/parallelengine/>
184. Horn JL. A rationale and test for the number of factors in factor analysis. *Psychometrika*. 1965;30:179–85.

185. Henson RK, Roberts JK. Use of Exploratory Factor Analysis in Published Research. Common errors and some comment on improved practice. *Educational and Psychological Measurement*. 2006;66(3):393–416. <https://doi.org/10.1177/0013164405282485>
186. Tavakol M, Dennick R. Making sense of Cronbach's alpha. *Int J Med Educ*. 2011;2:53–5. <https://doi.org/10.5116/ijme.4dfb.8dfd> PMID: 28029643
187. Hair J, Black W, Babin B, Anderson R. *Multivariate data analysis*. 7th ed. London, UK: Pearson; 2010.
188. Schumacker RE, Lomax RG. *A beginner's guide to structural equation modeling*. 3rd ed. New York: Routledge; 2010.
189. Byrne BM. *Structural equation modeling with Mplus: Basic concepts, applications, and programming*. 2nd ed. New York: Routledge; 2010.
190. Hu LT, Bentler PM. Cutoff criteria for fit indexes in covariance structure analysis: Conventional criteria versus new alternatives. *Structural Equation Modeling: A Multidisciplinary Journal*. 1999;6(1):1–55.
191. Browne MW, Cudeck R. Alternative ways of assessing model fit. *Sociological Methods & Research*. 1992;21(2):230–58.
192. Akaike H. A new look at the statistical model identification. *IEEE Transactions on Automatic Control*. 1974;19(6):716–23.
193. Hoelter JW. The analysis of covariance structures: Goodness-of-fit indices. *Sociological Methods & Research*. 1983;11(3):325–44. <https://doi.org/10.1177/0049124183011003003>
194. Hooper DC. Structural equation modeling. Guidelines for determining model fit. *The Electronic Journal of Business Research Methods*. 2010;6(1):53–60.
195. Bollen KA. *Structural equations with latent variables*. 1st ed. New York, USA: John Wiley & Sons; 1989.
196. Werner C, Schermelleh-Engel K. *Introduction to structural equation modeling with LISREL*. Frankfurt, Germany: Goethe University; 2010. Available from: [https://www.psychologie.uzh.ch/dam/jcr:fffff-b371-2797-0000-0000fda8f29/chisquare\\_diff\\_en.pdf](https://www.psychologie.uzh.ch/dam/jcr:fffff-b371-2797-0000-0000fda8f29/chisquare_diff_en.pdf)
197. Christopher M. *Logistics and supply chain management: Logistics & supply chain management*. 5th ed. London: Pearson; 2016.
198. Chopra S, Meindl P. *Supply chain management: Strategy, planning, and operation*. 8th ed. London: Pearson Education; 2021.
199. Gunasekaran A, Subramanian N, Papadopoulos T. Information technology for competitive advantage within logistics and supply chains: A review. *Transportation Research Part E: Logistics and Transportation Review*. 2017;99(C):14–33.
200. Cao M, Zhang Q. Supply chain collaboration: Impact on collaborative advantage and firm performance. *J Ops Management*. 2010;29(3):163–80. <https://doi.org/10.1016/j.jom.2010.12.008>
201. Frohlich MT, Westbrook R. Arcs of integration: an international study of supply chain strategies. *Journal of Operations Management*. 2001;19(2):185–200.
202. Lavie D. The competitive advantage of interconnected firms: An extension of the resource-based view. *Academy of Management Review*. 2006;31(3):638–58.
203. Bharadwaj A, El Sawy OA, Pavlou PA, Venkatraman N. Digital Business Strategy: Toward a Next Generation of Insights. *MISQ*. 2013;37(2):471–82. <https://doi.org/10.25300/misq/2013/37:2.3>
204. Mikalef P, Pateli A. Information technology-enabled dynamic capabilities and their indirect effect on competitive performance: findings from PLS-SEM and fsQCA. *Journal of Business Research*. 2017;70:1–16.
205. Zhang P, Zhao K, Kumar RL. Impact of IT Governance and IT Capability on Firm Performance. *Information Systems Management*. 2016;33(4):357–73. <https://doi.org/10.1080/10580530.2016.1220218>
206. Zhang Z, Wen F, Sun Z, Guo X, He T, Lee C. Artificial Intelligence-Enabled Sensing Technologies in the 5G/Internet of Things Era: From Virtual Reality/Augmented Reality to the Digital Twin. *Advanced Intelligent Systems*. 2022;4(7):2100228. <https://doi.org/10.1002/aisy.202100228>
207. Ivanov D, Dolgui A, Sokolov B. The impact of digital technology and Industry 4.0 on the ripple effect and supply chain risk analytics. *International Journal of Production Research*. 2019;57(3):829–46.
208. Dubey R, Gunasekaran A, Childe SJ, Blome C, Papadopoulos T. Big data and predictive analytics and manufacturing performance: integrating institutional theory, resource-based view and big data culture. *British Journal of Management*. 2019;30(2):341–61.
209. Mikalef P, Pateli A, van de Wetering R. IT architecture flexibility and IT governance decentralisation as drivers of IT-enabled dynamic capabilities and competitive performance: The moderating effect of the external environment. *European Journal of Information Systems*. 2021;30(5):512–40.
210. Dubey R, Gunasekaran A, Childe SJ, Papadopoulos T. Skills needed in supply chain-human agency and social capital analysis in third party logistics. *Management Decision*. 2018;56(1):143–59.
211. Lopez-Acevedo G, Robertson R. *Stitches to riches?: Apparel employment, trade, and economic development in South Asia*. World Bank Publications; 2016.
212. Lee JW, Jones PS, Mineyama Y, Zhang XE. Cultural differences in responses to a Likert scale. *Res Nurs Health*. 2002;25(4):295–306. <https://doi.org/10.1002/nur.10041> PMID: 12124723
